# Supplementary material
Source: PubMed Central journal article supplement (PMC3529023)
Supplement: 1211827110_sapp.pdf [file 1211827110_sapp.pdf]

# Supporting Information

## The great majority of recombination events in *Arabidopsis* are gene conversion events

Sihai Yang <sup>a,1</sup>, Yang Yuan <sup>a,1</sup>, Long Wang <sup>a,1</sup>, Jing Li <sup>a</sup>, Wen Wang <sup>b</sup>, Haoxuan Liu <sup>a</sup>, Jian-Qun Chen <sup>a,2</sup>, Laurence D. Hurst <sup>c,2</sup> and Dacheng Tian <sup>a,2</sup>

<sup>a</sup> State Key Laboratory of Pharmaceutical Biotechnology, Department of Biology, Nanjing University, Nanjing, China; <sup>b</sup> State Key Laboratory of Genetic Resources and Evolution, Kunming Institute of Zoology, Kunming, China; <sup>c</sup> Department of Biology and Biochemistry, University of Bath, Bath, U.K, BA2 7AY

**Table S1.** Summary statistics for sequencing data.

| Sample     | 1 <sup>st</sup> sequencing |                 | 2 <sup>nd</sup> sequencing |                 | 3 <sup>rd</sup> sequencing |                 | Overlapped Genome coverage |
|------------|----------------------------|-----------------|----------------------------|-----------------|----------------------------|-----------------|----------------------------|
|            | Mean depth                 | Genome coverage | Mean depth                 | Genome coverage | Mean depth                 | Genome coverage |                            |
| Sample_5   | 20.0                       | 97.6%           | 23.2                       | 98.7%           | —                          | —               | 97.5%                      |
| Sample_6   | 20.0                       | 99.1%           | 19.3                       | 98.5%           | —                          | —               | 98.3%                      |
| Sample_7   | 20.0                       | 97.5%           | 23.2                       | 98.7%           | —                          | —               | 97.3%                      |
| Sample_14  | 19.2                       | 97.2%           | 22.9                       | 97.9%           | —                          | —               | 96.9%                      |
| Sample_c41 | 19.4                       | 97.7%           | 23.3                       | 98.9%           | —                          | —               | 97.6%                      |
| Sample_c42 | 19.2                       | 98.4%           | 23.3                       | 99.1%           | —                          | —               | 98.3%                      |
| Sample_c45 | 19.3                       | 98.8%           | 23.3                       | 99.1%           | —                          | —               | 98.7%                      |
| Sample_c48 | 19.6                       | 99.3%           | 23.3                       | 99.4%           | —                          | —               | 99.1%                      |
| Sample_c51 | 19.6                       | 98.1%           | 23.3                       | 98.1%           | —                          | —               | 97.8%                      |
| Sample_c52 | 19.6                       | 97.8%           | 23.3                       | 98.2%           | —                          | —               | 97.6%                      |
| Sample_c54 | 19.6                       | 99.2%           | 23.3                       | 99.4%           | —                          | —               | 99.0%                      |
| Sample_c57 | 19.2                       | 98.3%           | 23.3                       | 99.1%           | —                          | —               | 98.2%                      |
| Sample_c61 | 19.4                       | 99.4%           | 23.3                       | 99.6%           | —                          | —               | 99.2%                      |
| Sample_c62 | 19.5                       | 98.3%           | 23.3                       | 98.9%           | —                          | —               | 98.1%                      |
| Sample_c63 | 19.2                       | 95.7%           | 23.3                       | 96.4%           | —                          | —               | 95.3%                      |
| Sample_c64 | 19.3                       | 99.3%           | 23.3                       | 99.4%           | —                          | —               | 99.1%                      |
| Sample_c65 | 19.2                       | 98.1%           | 23.3                       | 99.1%           | —                          | —               | 98.0%                      |
| Sample_c66 | 19.4                       | 98.9%           | 23.3                       | 99.6%           | —                          | —               | 98.8%                      |

|             |      |       |      |       |      |       |       |
|-------------|------|-------|------|-------|------|-------|-------|
| Sample_c73  | 19.5 | 99.2% | 19.5 | 99.0% | —    | —     | 98.8% |
| Sample_c81  | 19.6 | 96.0% | 23.3 | 95.9% | —    | —     | 95.5% |
| Sample_c82  | 19.4 | 96.2% | 23.3 | 96.5% | —    | —     | 95.8% |
| Sample_c83  | 19.7 | 98.6% | 23.3 | 99.5% | —    | —     | 98.5% |
| Sample_c84  | 19.8 | 97.1% | 23.3 | 96.8% | —    | —     | 96.3% |
| Sample_c85  | 19.7 | 98.8% | 23.3 | 99.6% | —    | —     | 98.8% |
| Sample_c87  | 19.7 | 97.8% | 21.8 | 98.4% | —    | —     | 97.6% |
| Sample_c88  | 19.8 | 98.9% | 21.6 | 99.2% | —    | —     | 98.8% |
| Sample_c89  | 19.3 | 96.6% | 23.3 | 97.4% | —    | —     | 96.3% |
| Sample_c90  | 19.5 | 98.1% | 22.5 | 98.7% | —    | —     | 98.0% |
| Sample_c91  | 19.4 | 96.5% | 23.3 | 96.6% | —    | —     | 95.8% |
| Sample_c92  | 19.5 | 97.1% | 23.3 | 97.9% | —    | —     | 96.9% |
| Sample_c93  | 19.6 | 99.1% | 23.3 | 99.5% | —    | —     | 99.1% |
| Sample_c94  | 33.0 | 95.5% | 34.0 | 95.5% | 32.4 | 95.4% | 94.6% |
| Sample_c95  | 31.4 | 98.0% | 31.2 | 98.0% | 32.2 | 98.0% | 97.8% |
| Sample_4    | 20.0 | 96.5% | —    | —     | —    | —     | —     |
| Sample_8    | 20.0 | 98.0% | —    | —     | —    | —     | —     |
| Sample_18   | 20.0 | 98.2% | —    | —     | —    | —     | —     |
| Sample_19   | 20.0 | 97.3% | —    | —     | —    | —     | —     |
| Sample_20   | 20.5 | 97.7% | —    | —     | —    | —     | —     |
| Sample_21   | 20.0 | 96.3% | —    | —     | —    | —     | —     |
| Sample_c47  | 19.4 | 98.2% | —    | —     | —    | —     | —     |
| Col3        | 28.3 | 99.9% | 28.1 | 99.9% | 28.6 | 99.9% | 99.9% |
| Ler4        | 31.2 | 93.6% | 31.0 | 93.6% | 31.5 | 93.6% | 93.1% |
| Sample_c1c2 | 23.3 | 99.0% | —    | —     | —    | —     | —     |
| Sample_c2l1 | 23.3 | 99.1% | —    | —     | —    | —     | —     |
| Sample_l3c1 | 23.3 | 99.5% | —    | —     | —    | —     | —     |
| Sample_l1l2 | 23.3 | 93.4% | —    | —     | —    | —     | —     |
| Sample_l2l3 | 23.3 | 93.2% | —    | —     | —    | —     | —     |

The *Arabidopsis thaliana* accession “Columbia-0” (Col) and “Landsberg *erecta*” (Ler) were obtained from Joy Bergelson (University of Chicago). In total, there are 75 sequenced F<sub>2</sub> genomes with 1649×coverage. In addition, one of Ler (Ler<sub>4</sub>) and Col (Col<sub>3</sub>) were independently sequenced thrice with ~29.8×coverage in each sequencing. The other 3 Ler (Ler<sub>1</sub>, Ler<sub>2</sub> and Ler<sub>3</sub>) and 2 Col plants (Col<sub>1</sub> and Col<sub>2</sub>) were sequenced with ~21.2× coverage. In these raw reads, more than 90% bases have the phred quality greater than 29 in the raw reads, while 30 in the mapping reads, indicating high sequencing quality. In raw reads, more than 99% are of the length of 100; in mapping reads, more than 90% reads have the length greater than 96. This Table also showed that the average depth was 22.2X, ranging from 19.2 to 33.9X; the mean coverage mapping to the reference genome was 98.2%, ranging from 93.2 to 99.9%. These statistical analyses have shown a high sequencing quality and depth.

**Table S2. Comparison of sequencing strategy and quality between Lu's (Lu et al. 2012) and this study**

| Items          | Sequencing rounds for each sample                                        | Strategy of sequencing            | Length of the reads | Coverage for each sequencing                                                                                       |
|----------------|--------------------------------------------------------------------------|-----------------------------------|---------------------|--------------------------------------------------------------------------------------------------------------------|
| Lu et al. 2011 | Once                                                                     | Single-end reads                  | 46.5 bp (35-70bp)   | 12.8× (8.2 to 16.6×) in each sample                                                                                |
|                |                                                                          | Paired-end reads in 200bp inserts | 2×40 bp             |                                                                                                                    |
| This study     | Twice or thrice, both independent library constructing and re-sequencing | Paired-end reads in 500bp inserts | 2×100 bp            | 22.2 × (19.3 to 33.9×) in each sequencing; 42.4× in twice sequencing samples and 97.0× in trice sequencing samples |

In this study, the paired-end reads with 2×100 bp in average 500bp long inserts should be good for mapping correctly in the small Arabidopsis genome with small proportion of repeat sequences. This expectation was showed in the results of zero controls (Table S4), where no error was observed in the >10kb blocks in our sequences and by the methods of block identification.

**Table S3-1.** The possible events of GCs identified in 4 samples of Lu's study by the criteria used in this study for different sets of gene conversions

| Samples       | Col→Ler | Ler→Col | Total |
|---------------|---------|---------|-------|
| The Sample 1A |         |         |       |
| GCs Set 3     | 3211    | 9808    | 13019 |
| GCs Set 2     | 421     | 2036    | 2457  |
| GCs Set 1     | 3900    | 5504    | 9404  |
| 2-10kb blocks | 502     | 320     | 822   |
| The Sample 1B |         |         |       |
| GCs Set 3     | 559     | 24738   | 25297 |
| GCs Set 2     | 100     | 6223    | 6323  |
| GCs Set 1     | 801     | 8542    | 9343  |
| 2-10kb blocks | 157     | 390     | 547   |
| The Sample 1C |         |         |       |
| GCs Set 3     | 88      | 3988    | 4076  |
| GCs Set 2     | 13      | 1033    | 1046  |
| GCs Set 1     | 59      | 1253    | 1312  |
| 2-10kb blocks | 9       | 71      | 80    |
| The Sample 1D |         |         |       |
| GCs Set 3     | 4885    | 31530   | 36415 |
| GCs Set 2     | 784     | 7298    | 8082  |
| GCs Set 1     | 6369    | 15509   | 21878 |
| 2-10kb blocks | 702     | 668     | 1370  |
| Average       | 2185.8  | 17516   | 19702 |

All the 4 samples were from backcrossing with Col, so GCs should be generated from homozygous to heterozygous backgrounds. Different criteria are used for each of three sets of gene conversions in this study: in the first set, each GC event must contain  $\geq 2$  continuous markers in two or three rounds of sequencings and with GC length 20-2000 bp; in the second set, the quality control is the same as in the first set but with 2-19 bp between two border markers; in the third set, 1 or 2 gold standard markers in two or three rounds of sequencings were required. For the third set, the less-reliable SNPs could not be used to increase the reliability of GCs identified, because only one marker was required in either or both independent sequencings.

**Table S3-2.** Comparison of numbers and types of gene conversions between the two independent sequencings in 31 F<sub>2</sub> plants

| Samples                             | Col→Het     | Ler→Het     | Het→Col     | Het→Ler | Total   |
|-------------------------------------|-------------|-------------|-------------|---------|---------|
| First sequencing                    |             |             |             |         |         |
| GCs Set 3                           | 172.2       | 3794.5      | 9691.5      | 845.2   | 14503.4 |
| GCs Set 2                           | 19.5        | 746.9       | 1930.9      | 119.5   | 2816.9  |
| GCs Set 1                           | 91.2        | 697.2       | 3397.3      | 112.7   | 4298.5  |
| 2-10kb blocks                       | 14.4        | 24.6        | 112.9       | 6.4     | 158.3   |
| Second sequencing                   |             |             |             |         |         |
| GCs Set 3                           | 171.9       | 3258.8      | 7268.9      | 486.0   | 11185.6 |
| GCs Set 2                           | 19.0        | 688.3       | 1491.0      | 69.9    | 2268.2  |
| GCs Set 1                           | 77.0        | 438.6       | 2017.3      | 51.3    | 2584.1  |
| 2-10kb blocks                       | 14.0        | 13.8        | 66.3        | 3.4     | 97.5    |
| Average for two samples             | 289.6       | 4831.4      | 12988.1     | 847.2   | 18956.3 |
| Overlapped by two sequencings       |             |             |             |         |         |
| GCs Set 3                           | 169.9       | 1118.4      | 774.0       | 245.2   | 2307.5  |
| GCs Set 2                           | 18.5        | 243.8       | 27.1        | 31.5    | 320.9   |
| GCs Set 1                           | 72.3        | 127.5       | 46.1        | 19.5    | 265.3   |
| 2-10kb blocks                       | 13.9        | 8.2         | 4.6         | 3.5     | 30.2    |
| Total                               | 274.6       | 1497.9      | 851.8       | 299.6   | 2923.9  |
| Relative rate to one sequencing     |             |             |             |         |         |
| GCs Set 3                           | 0.98        | 0.32        | <b>0.09</b> | 0.37    | 0.18    |
| GCs Set 2                           | 0.96        | 0.34        | <b>0.02</b> | 0.33    | 0.13    |
| GCs Set 1                           | <b>0.86</b> | <b>0.22</b> | 0.02        | 0.24    | 0.08    |
| 2-10kb blocks                       | <b>0.97</b> | <b>0.43</b> | 0.05        | 0.71    | 0.24    |
| Relative rate to Lu' data for Set 1 |             |             |             |         |         |
| For one sequencing                  | <b>0.03</b> | <b>0.03</b> | /           | /       | /       |
| For two sequencings                 | <b>0.03</b> | <b>0.02</b> | /           | /       | /       |

The number of GCs or blocks is an average for 31 plants, either one or two rounds of sequencings. The same criteria were used as those in Table 2 and Table S5 and S8. The relative rates were calculated as the number identified by two rounds of sequencings divided by the average number in one rounds of sequencings (the first and the second). The relative rates to Lu et al's data were calculated as the total numbers of GCs set 1 in one or two rounds of sequencings divided by the average corresponding numbers in Table S3-1.

The first rates showed that the errors could be reduced to only 2-9% for set 2-3 when the numbers were too high to be true in the first round of sequencing. However, when the low numbers were observed in first round, supposed to be more reliable, the rates were less reduced, e.g., for the set 1 and small blocks. The second rates showed that the rates in the samples with higher quality and coverage were reduced to 2-3%, compared with those in Lu's data. The reduced numbers should be errors most-likely, and the remained should contain the correct ones, almost 100% of which were confirmed by PCR and Sanger sequencing in Table 2. This indicates almost 100% of errors were reduced.

**Table S4.** The error numbers and types of gene conversions in the mixed samples of Col and Ler DNA.

| <b>Samples</b>      | <b>Col→Het</b> | <b>Ler→Het</b> | <b>Het→Col</b> | <b>Het→Ler</b> | <b>Total</b> |
|---------------------|----------------|----------------|----------------|----------------|--------------|
| <b>CK 1 (C2L1)</b>  |                |                |                |                |              |
| GCs Set 3           | 0              | 7              | 20712          | 16579          | 37298        |
| GCs Set 2           | 1              | 0              | 288            | 2604           | 2893         |
| GCs Set 1           | 0              | 1              | 712            | 4837           | 5550         |
| 2-10kb blocks       | 0              | 0              | 6              | 53             | 59           |
| 10-500 kb blocks    | —              | —              | —              | —              | 0            |
|                     |                |                |                |                | <b>45800</b> |
| <b>CK 2 (L3C1)</b>  |                |                |                |                |              |
| GCs Set 3           | 1              | 1              | 12287          | 6491           | 18780        |
| GCs Set 2           | 0              | 0              | 329            | 971            | 1300         |
| GCs Set 1           | 2              | 0              | 465            | 1113           | 1580         |
| 2-10kb blocks       | 0              | 0              | 2              | 12             | 14           |
| 10-500 kb blocks    | —              | —              | —              | —              | 0            |
|                     |                |                |                |                | <b>21674</b> |
| <b>CK 1 + CK 2</b>  |                |                |                |                |              |
| GCs Set 3           | 0              | 0              | 1744           | 1771           | 3515         |
| GCs Set 2           | 0              | 0              | 44             | 187            | 231          |
| GCs Set 1           | 0              | 0              | 11             | 151            | 162          |
| 2-10kb blocks       | 0              | 0              | 0              | 0              | 0            |
| 10-500 kb blocks    | —              | —              | —              | —              | 0            |
|                     |                |                |                |                | <b>3908</b>  |
| Relative Error rate |                |                |                |                |              |
| GCs Set 3           | 0.00           | 0.00           | 0.11           | 0.15           | 0.13         |
| GCs Set 2           | 0.00           | /              | 0.14           | 0.10           | 0.11         |
| GCs Set 1           | /              | 0.00           | <b>0.02</b>    | <b>0.05</b>    | 0.05         |
| 2-10kb blocks       | /              | /              | <b>0.00</b>    | <b>0.00</b>    | 0.00         |
| Total               |                |                |                |                | 0.12         |

The criteria for the identification of set 1 - 3 of GCs and 2-500kb blocks were the same as for those in Table 1-2, Table S5 and S8. The relative rates were calculated as the number identified by two rounds of sequencings (CK 1 + CK 2) divided by the average number by one rounds of sequencings (CK 1 or CK 2). The two samples of Col and Ler DNA mixtures, C<sub>2</sub>L<sub>1</sub> and L<sub>3</sub>C<sub>1</sub>, were used as zero controls, because no COs and GCs could be generated in these plants. Indeed by two rounds of independent sequencings, the errors of 2-10kb and <2kb blocks are reduced to 0% and 2-5%, respectively. These results showed that: 1) the two rounds of sequencings are critical to reduce the error rate of GCs in Table 2 and of small blocks; 2) all >10 kb blocks identified in F<sub>2</sub> plants are expected to be correct, because no single block with >10kb was detected in either CK1 or CK2; 3) the higher error rates in heterozygous regions, particularly from Het→Ler, are probably due to the local coverage variation of sequence reads. When missing one or more reads containing two markers in two rounds of sequencing, a false GC event will be present. This result is consistent to the PCR results in Table 2.

**Table S5. The second set of gene conversions in 33 F2 plants.**

| Sample      | Col→Hete | Hete→Col | Hete→Ler | Ler→Hete | Total |
|-------------|----------|----------|----------|----------|-------|
| Sample_14   | 18       | 49       | 81       | 198      | 346   |
| Sample_5    | 17       | 47       | 61       | 151      | 276   |
| Sample_6    | 7        | 34       | 47       | 261      | 349   |
| Sample_7    | 26       | 34       | 56       | 220      | 336   |
| Sample_c42  | 15       | 1        | 1        | 90       | 107   |
| Sample_c45  | 18       | 6        | 0        | 121      | 145   |
| Sample_c48  | 15       | 16       | 13       | 198      | 242   |
| Sample_c51  | 17       | 36       | 15       | 293      | 361   |
| Sample_c52  | 22       | 14       | 17       | 172      | 225   |
| Sample_c57  | 2        | 31       | 16       | 150      | 199   |
| Sample_c61  | 22       | 23       | 26       | 44       | 115   |
| Sample_c62  | 28       | 41       | 44       | 189      | 302   |
| Sample_c63  | 13       | 19       | 18       | 584      | 634   |
| Sample_c64  | 17       | 18       | 7        | 122      | 164   |
| Sample_c65  | 21       | 14       | 16       | 215      | 266   |
| Sample_c66  | 16       | 13       | 25       | 67       | 121   |
| Sample_c73  | 18       | 42       | 52       | 59       | 171   |
| Sample_c81  | 7        | 69       | 79       | 500      | 655   |
| Sample_c82  | 22       | 50       | 75       | 526      | 673   |
| Sample_c83  | 22       | 7        | 13       | 161      | 203   |
| Sample_c84  | 2        | 13       | 28       | 307      | 350   |
| Sample_c85  | 25       | 33       | 43       | 67       | 168   |
| Sample_c87  | 25       | 39       | 46       | 403      | 513   |
| Sample_c88  | 12       | 10       | 15       | 283      | 320   |
| Sample_c89  | 22       | 15       | 12       | 225      | 274   |
| Sample_c90  | 32       | 25       | 20       | 190      | 267   |
| Sample_c91  | 25       | 63       | 83       | 632      | 803   |
| Sample_c92  | 14       | 26       | 19       | 388      | 447   |
| Sample_c93  | 31       | 11       | 11       | 133      | 186   |
| Sample_c94  | 16       | 21       | 29       | 435      | 501   |
| Sample_c95  | 28       | 20       | 8        | 174      | 230   |
| *Sample_c41 | 35       | 92       | 16       | 22       | 165   |
| *Sample_c54 | 9        | 35       | 12       | 231      | 287   |
| Average     | 18.5     | 27.1     | 31.5     | 243.8    | 320.9 |

Each GC must contain  $\geq 2$  continuous markers in two rounds of sequencings. However, the distance is only 2-19 bp long between two border markers (the farthest distance between two or more markers). This set of data has also been modified via adding less-reliable 212,617 SNPs. If the GC events disrupted by the added markers, these candidate GCs were discarded. Owing to poor sequencing quality, ~50 and 60 MB regions were wiped out in Sample c41 and c54, respectively. Therefore, these two samples were excluded from the calculation of average data. PCR amplification and Sanger sequencing confirmed 100% of 5 samples in homozygous and 30% of 24 sampled in heterozygous regions. Because 100% of GCs in Col background were confirmed, the estimated GCs per genome are 73, based on the equation in Table 2.

**Table S6. Identified GCs in non-repeat and repeat regions**

| GCs           | Markers of GCs involved in repeat or non-repeat regions |                               |                                        | Total |
|---------------|---------------------------------------------------------|-------------------------------|----------------------------------------|-------|
|               | All markers in non-repeat regions                       | All markers in repeat regions | Parts of markers in non-repeat regions |       |
| GCs per plant | 116.7                                                   | 103.5                         | 45.1                                   | 265.3 |
| Percent (%)   | 44.0                                                    | 39.0                          | 17.0                                   | 100   |

The repeat and non-repeat sequences were grouped by both annotated TEs and RepeatMasker regions for *Arabidopsis* (<http://www.repeatmasker.org/>) and calculated separately for recombination events to avoid the possible assembly problems in repeat regions. In total, 26.7 and 92.3 Mb regions were identified as repeat and non-repeat sequences in *Arabidopsis*. Then the first set of 265.3 GCs identified in Table 2 could be categorized as all markers of a GC in repeat, all in non-repeat and parts of markers in non-repeat regions, which resulted in 103.5 (39.0%), 116.7 (44.0%) and 45.1 (17.0%), respectively for the three categories of GCs. In total, 61.0% of GCs were located in or partly in non-repeat regions. These results showed that majority of GCs identified cannot be mapping errors because the sequences around markers in non-repeat regions are unique in *Arabidopsis* genome (this can be further confirmed by Blast search).



**Table S7. PCR confirmation in non-repeat and repeat regions**

| GCs    | Confirmed GCs by PCR and sequencing | PCR numbers in involved in repeats or non-repeats |                              |                                        | Total |
|--------|-------------------------------------|---------------------------------------------------|------------------------------|----------------------------------------|-------|
|        |                                     | All markers in non-repeat regions                 | All markers in repeat region | Parts of markers in non-repeat regions |       |
| Set 1  | True                                | 48                                                | 35                           | 21                                     | 104   |
|        | False                               | 7                                                 | 12                           | 3                                      | 22    |
| Set 2  | True                                | 0                                                 | 6                            | 6                                      | 12    |
|        | False                               | 7                                                 | 5                            | 5                                      | 17    |
| Set 3  | True                                | 7                                                 | 6                            | 0                                      | 13    |
|        | False                               | 12                                                | 12                           | 0                                      | 24    |
| 2-10kb | True                                | 6                                                 | 1                            | 3                                      | 10    |
|        | False                               | 0                                                 | 0                            | 0                                      | 0     |
| Total  | True                                | 61                                                | 48                           | 30                                     | 139   |
|        | False                               | 26                                                | 29                           | 8                                      | 63    |

All PCR pairs of primers used for the confirmation of GCs were unique pairs of sequences in Arabidopsis genome. Therefore, these PCR results should be reliable for both repeat and non-repeat regions to confirm whether the GCs identified are true or false. In fact, the confirmed rate in non-repeat (61/87) is similar to that of repeat regions (48/77).

**Table S8. The third set of gene conversions in 33 F2 plants.**

| Sample      | Col→Hete | Hete→Col | Hete→Ler | Ler→Hete | Total  |
|-------------|----------|----------|----------|----------|--------|
| Sample_14   | 154      | 1741     | 734      | 1008     | 3637   |
| Sample_5    | 186      | 1494     | 545      | 674      | 2899   |
| Sample_6    | 80       | 974      | 334      | 1160     | 2548   |
| Sample_7    | 123      | 1244     | 459      | 852      | 2678   |
| Sample_c42  | 139      | 169      | 0        | 470      | 778    |
| Sample_c45  | 196      | 413      | 0        | 544      | 1153   |
| Sample_c48  | 145      | 388      | 104      | 658      | 1295   |
| Sample_c51  | 179      | 571      | 146      | 1280     | 2176   |
| Sample_c52  | 211      | 559      | 135      | 716      | 1621   |
| Sample_c57  | 19       | 502      | 140      | 595      | 1256   |
| Sample_c61  | 221      | 690      | 209      | 147      | 1267   |
| Sample_c62  | 365      | 1068     | 352      | 1106     | 2891   |
| Sample_c63  | 211      | 589      | 168      | 2482     | 3450   |
| Sample_c64  | 204      | 421      | 92       | 393      | 1110   |
| Sample_c65  | 143      | 435      | 149      | 805      | 1532   |
| Sample_c66  | 115      | 575      | 177      | 201      | 1068   |
| Sample_c73  | 160      | 1124     | 323      | 160      | 1767   |
| Sample_c81  | 104      | 1674     | 623      | 2199     | 4600   |
| Sample_c82  | 156      | 1627     | 631      | 2055     | 4469   |
| Sample_c83  | 163      | 353      | 97       | 474      | 1087   |
| Sample_c84  | 33       | 516      | 149      | 1328     | 2026   |
| Sample_c85  | 336      | 992      | 248      | 261      | 1837   |
| Sample_c87  | 226      | 1063     | 372      | 1392     | 3053   |
| Sample_c88  | 119      | 362      | 73       | 850      | 1404   |
| Sample_c89  | 193      | 435      | 105      | 1235     | 1968   |
| Sample_c90  | 233      | 583      | 118      | 846      | 1780   |
| Sample_c91  | 163      | 1418     | 541      | 2750     | 4872   |
| Sample_c92  | 159      | 558      | 175      | 1475     | 2367   |
| Sample_c93  | 303      | 312      | 87       | 491      | 1193   |
| Sample_c94  | 169      | 53       | 19       | 6633     | 6874   |
| Sample_c95  | 413      | 144      | 13       | 2480     | 3050   |
| *Sample_c41 | 302      | 1514     | 121      | 89       | 2026   |
| *Sample_c54 | 33       | 619      | 77       | 801      | 1530   |
| Average     | 181.3    | 743.5    | 236.1    | 1216.8   | 2377.6 |

Each GC must contain  $\geq 1$  marker in two rounds of sequencings. When a GC has only one marker, its track length is unavailable. Attributed to the sequencing quality, ~50 and 60 MB regions were wiped out in Sample c41 and c54, respectively. Therefore, these two samples were excluded from the calculation of average data. As above (Table S5), Samples c41 and c54 were excluded from the calculation of average data. PCR amplification and Sanger sequencing confirmed 100% of 9 samples in homozygous and 14.3% of 28 sampled in heterozygous regions.

**Table S9. Estimating the GC rate in the genome.**

|           | Average GC tract length (bp) | The rate of GC per site in the genome (the total length of all GC tracks divided by the genome length) |
|-----------|------------------------------|--------------------------------------------------------------------------------------------------------|
| Observed  | 335                          | 0.0007                                                                                                 |
| Simulated | 704                          | 0.0015                                                                                                 |

In this study, we assume that 265 GC events are detected in each sample and employ these to estimate the mean tract length and the proportion of the genome subject to tracts including missed events. For each GC event, we use parameter  $i$  to stand for the start mark and  $j$  to represent the last mark.  $m_i$  and  $m_j$  describe the genome position of the mark  $i$  and mark  $j$ .

It is known that there are two breakpoints in each GC event, one of which is between mark  $i-1$  and mark  $i$  and the other is between mark  $j$  and mark  $j+1$ . We assume  $x_1$  was one base between mark  $i-1$  and mark  $i$ , and  $x_2$  was between mark  $j$  and mark  $j+1$ . As in model 1 described in Genes 2: 313-331, the elongation of converted tracts in the two directions independently follows an exponential distribution:

$$P(x_1, x_2 | T) = \frac{4}{T^2} e^{-\frac{2(x_2-x_1)}{T}}$$

Here  $T$  stands for the expected GC length. And then the probability that the GC event described by  $i, j$  is

$$\text{Prob}(i, j | T) = \int_{m_{i-1}}^{m_i} \int_{m_j}^{m_{j+1}} P(x_1, x_2 | T) dx_2 dx_1$$

From here we can obtain the relationship between probability of a GC event and the  $T$ . For these GC events,  $m_{i-1}$ ,  $m_i$ ,  $m_j$  and  $m_{j+1}$  are constants, and for each  $T$  value between  $(m_j - m_i)$  and  $(m_{j+1} - m_{i-1})$ , we can get a probability of the GC events. When the probability reaches the maximum value,  $T$  indicates the most probable GC length. This suggests the average expected GC track is 704bp and the gene conversion rate of all the genome is 0.0015 per site. If without using this model, the average length of each GC track is 335bp and the GC rate in the genome is about 0.0007 per site.

#### Reference

Mansai SP, Kado T, Innan H. (2011) The rate and tract length of gene conversion between duplicated genes. Genes 2: 313-33

**Table S10.** Confirmation of 10 candidate GCs near centromeric regions by a single-stranded cloning strategy.

| Loci | Sa<br>mpl<br>es | Chr. | Orientation<br>of GCs | Start<br>position of<br>GCs | End<br>position of<br>GCs | Distance from<br>Centromeres | PCR Regions       | Non-phased<br>genotypes | Genotypes of<br>the sequencing<br>results |
|------|-----------------|------|-----------------------|-----------------------------|---------------------------|------------------------------|-------------------|-------------------------|-------------------------------------------|
| 1    | c90             | 1    | Col->Hete             | 13037739                    | 13037841                  | 262159                       | 13037535-13037878 | CCCHHC                  | CCCCC                                     |
|      |                 |      |                       |                             |                           |                              |                   |                         | CCLLC                                     |
| 2    | c90             | 1    | Col->Hete             | 16675486                    | 16675554                  | 675486                       | 16674803-16675572 | CCCHHHHHC               | CCCCCCCC                                  |
|      |                 |      |                       |                             |                           |                              |                   |                         | CCLLLLLC                                  |
| 3    | c52             | 2    | Col->Hete             | 1840318                     | 1841004                   | 1258111                      | 1839746-1841889   | CCHHC                   | CCCC                                      |
|      |                 |      |                       |                             |                           |                              |                   |                         | CLLC                                      |
| 4    | c52             | 2    | Col->Hete             | 3037888                     | 3038286                   | 61596                        | 3037766-3038404   | CCHHHCC                 | CCCCCC                                    |
|      |                 |      |                       |                             |                           |                              |                   |                         | CLLCC                                     |
| 5    | c93             | 3    | Col->Hete             | 11676329                    | 11676361                  | 223639                       | 11676200-11676615 | CCHHCC                  | CCCCC                                     |
|      |                 |      |                       |                             |                           |                              |                   |                         | CLLCC                                     |
| 6    | c93             | 3    | Col->Hete             | 15265697                    | 15265744                  | 165616                       | 15265616-15265849 | CCCHHCC                 | CCCCCC                                    |
|      |                 |      |                       |                             |                           |                              |                   |                         | CCLLCC                                    |
|      | c62             | 4    | Col->Hete             | 1653179                     | 1653277                   | 1246401                      | 1653108-1653599   | CHHCC                   | CCCC                                      |
|      |                 |      |                       |                             |                           |                              |                   |                         | CLCC                                      |
| 8    | c62             | 4    | Col->Hete             | 5560971                     | 5561132                   | 460494                       | 5560494-5562044   | CCHHHHC                 | CCCCCC                                    |
|      |                 |      |                       |                             |                           |                              |                   |                         | CCLLLLC                                   |
| 9    | c66             | 5    | Col->Hete             | 9952328                     | 9953414                   | 46586                        | 9952265-9953448   | CCHHHHHC                | CCCCCCCC                                  |
|      |                 |      |                       |                             |                           |                              |                   |                         | CCLLLLLC                                  |
| 10   | c66             | 5    | Col->Hete             | 14116137                    | 14116311                  | 616137                       | 14115529-14116592 | CCHHC                   | CCCC                                      |
|      |                 |      |                       |                             |                           |                              |                   |                         | CLLC                                      |

A single-stranded cloning strategy was employed. This can unambiguously tell the exact sequence for each sister chromosome at the same region. Two criteria were used to choose the candidate GCs: 1) the background of these candidate GCs should be pure Col-0, where the exact genome sequences are available to determine the chromosome positions of GCs, particularly for those near centromeres. This requires that the direction of GCs should be Col -> Ler and the non-phased genotype of the chromosome pair of the GCs should be “CCCCCCHHHCCCCC” (C, pure Col genotype markers; H, Heterozygous genotype; Fig. S11); 2) the primers must be designed on the pure Col regions and cover all of the heterozygous tract. Then, the PCR products were cloned into pGEM-T Easy vectors (Promega) and at least five clones were selected to sequence (Sanger sequencing). Finally, 10 candidate GCs, putatively located in pericentromeric regions, have been analysed by this strategy. Two haplotypes, “CCCCCCLLLCCCCC” (L, pure Ler genotype markers;) and “CCCCCCCCCCCCC”, were detected in all of 10 candidate GCs, indicating that these GCs are in the pericentromeric regions.

**Table S11. MEME motifs identified surrounding or within shared COs or GCs.**

| <b>Unique motifs (only present in certain loci of GCs and COs)</b>             |                                     |              |                |
|--------------------------------------------------------------------------------|-------------------------------------|--------------|----------------|
| <b>Width</b>                                                                   | <b>Regular expression</b>           | <b>Sites</b> | <b>E-value</b> |
| <b>SHARED_BP</b>                                                               | 942                                 |              |                |
| 15                                                                             | G[N]C[N][N]C[N]G[N]AG[N][N]GC       | 61           | 1.4e-053       |
| 15                                                                             | [N]AA[N]AA[N]AA[N][N][N][N]AA       | 99           | 1.6e-048       |
| 14                                                                             | [N][N][N]GA[N]C[N]GG[N][N]GC        | 97           | 6.9e-041       |
| 14                                                                             | [N][N]C[N]GG[N]G[N]CTTC[N]          | 53           | 1.1e-038       |
| <b>SHARED_INTER</b>                                                            | 797                                 |              |                |
| 14                                                                             | G[N][N][N][N]TGGTGG[N]GG            | 30           | 3.4e-012       |
| 13                                                                             | A[N][N][N]A[N]A[N]A[N]A[N]A         | 98           | 1.7e-010       |
| <b>General motifs (present in group 1 &amp; 2 sequences and NONE GC group:</b> |                                     |              |                |
| <b>Width</b>                                                                   | <b>Regular expression</b>           | <b>Sites</b> | <b>E-value</b> |
| <b>SHARED_BP</b>                                                               | 942                                 |              |                |
| 15                                                                             | AGA[N][N]AA[N]A[N][N][N]A[N]A       | >=100        | 2.2e-146       |
| 14                                                                             | [N][N]G[N][N]GG[N]GGAG[N][N]        | >=100        | 4.0e-083       |
| 14                                                                             | AA[N]AAAAAA[N]AAAA                  | >=100        | 1.6e-112       |
| 13                                                                             | C[N]TC[N]TCTTCT[N]C                 | 99           | 3.3e-070       |
| 15                                                                             | [N]T[N]T[N][N][N]T[N]T[N][N][N]T[N] | >=100        | 1.3e-059       |
| 14                                                                             | [N][N]AGA[N][N][N]AA[N]A[N][N]      | 98           | 8.8e-030       |
| <b>SHARED_INTER</b>                                                            | 797                                 |              |                |
| 14                                                                             | AAAA[AG]AAAAAAAAA                   | 99           | 5.2e-128       |
| 15                                                                             | [N]T[N]T[N][N][N]TCT[N][N][N]T[N]   | >=100        | 9.6e-088       |
| 11                                                                             | AAAAAAAAAAAA                        | 98           | 1.2e-072       |
| 11                                                                             | GA[N]GA[N]GA[N]GA                   | >=100        | 2.0e-029       |
| 15                                                                             | A[N]A[N][N][N][N][N]A[N]AGA[N]A     | 92           | 1.1e-020       |
| 15                                                                             | G[N]A[N]GAG[N][N][N]GA[N][N]A       | 48           | 2.7e-003       |
| 10                                                                             | TTTT[N]TTT[N]                       | 89           | 2.7e-003       |

Several groups of sequences were chosen to search candidate motifs by using MEME software (<http://meme.nbcr.net>). 1) SHARED\_BP: The 100-1000bp flanking regions of shared GCs and COs. A total of 942 sequences (471 loci) were chosen for this group. 2) SHARED\_INTER: Converted regions of shared GCs and tracts of COs, with shared individual frequency  $\geq 2$ . Each of sequences contains repeat masked regions no more than 50%. This group contains 797 sequences. (3) NONE\_GC: Regions where no GC event found, with length  $\leq 2000$ bp, this group contains 1000 sequences chosen by random. This group was used as a control to compare whether there are unique motifs in other groups. All repetitive regions were masked with Ns use RepeatMasker (with RM database version 20110920), and all TE regions annotated by TAIR9 were also masked with Ns with a local PERL script. Several criteria were applied to keep a reasonable size of each dataset in considering of the speed of MEME. The MEME software was run locally with options: -nmotifs = 10, -evt = 0.01, -minw = 10, -maxw = 15, -maxsites = 100, -mod = anr. The MEME results showed that some of shared loci have a specific motif(s), and some have a different one(s) either surrounding or within shared GCs (or COs). However, the others have no conserved ones.

**Fig. S1. The distribution of COs on five pairs of chromosomes in 40 F<sub>2</sub> plants. 415,357 reliable markers were used for COs identification.** Based on this amount of markers and a random occurrence model, every long CO (>500 kb) should have a specific tract length, a piece between two COs. The probability of cross-over occurs at the same locus in two independent meioses is expected to be almost zero. For example, with dense and physically unlinked markers (e.g., >300000) and sparse recombination events (e.g., <1000) in a diploid plant, assuming a random occurrence model, the probability of two events occurring between the same two markers is roughly equal to  $1000/300000^2 = 1.1 \times 10^{-8}$ .

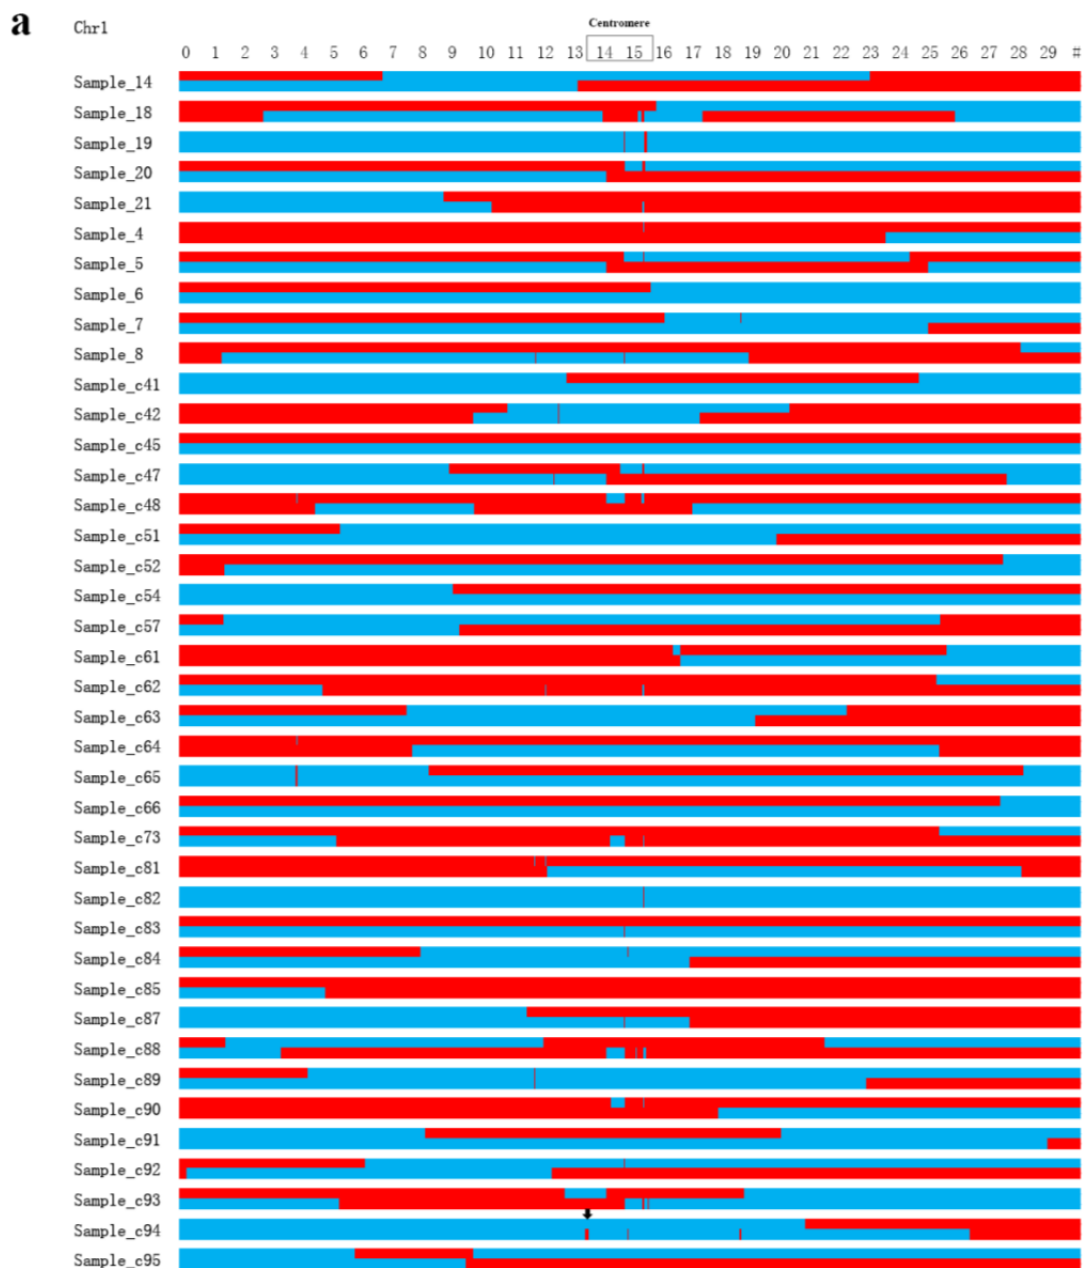

**b**

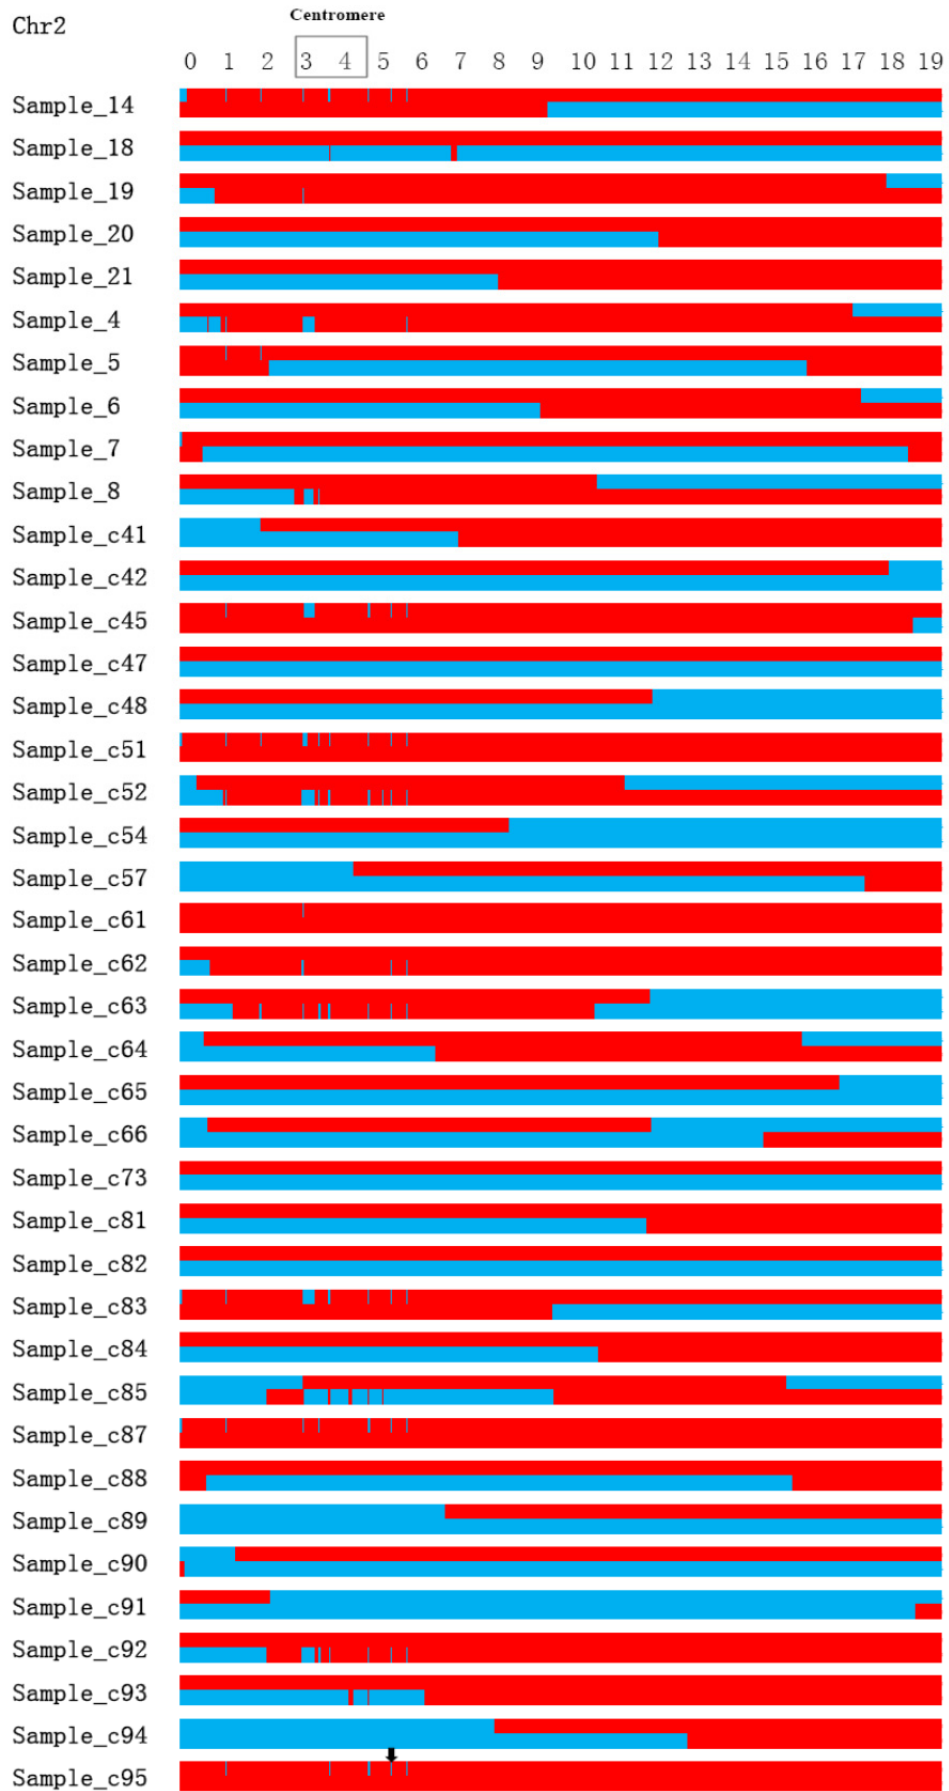

**C**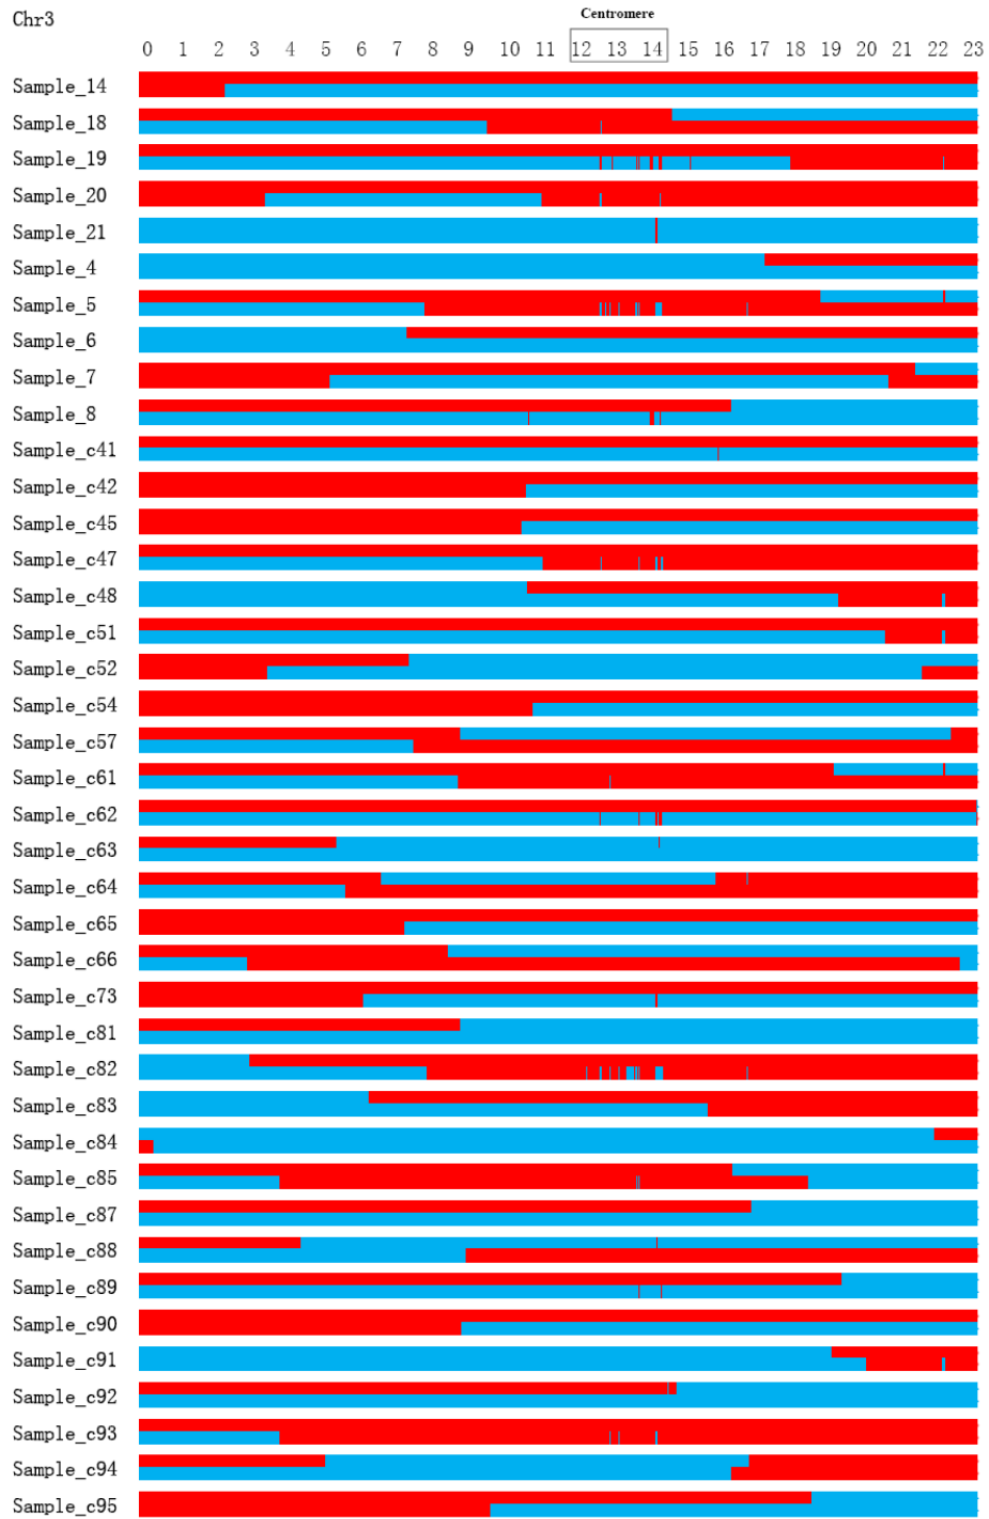



**d**

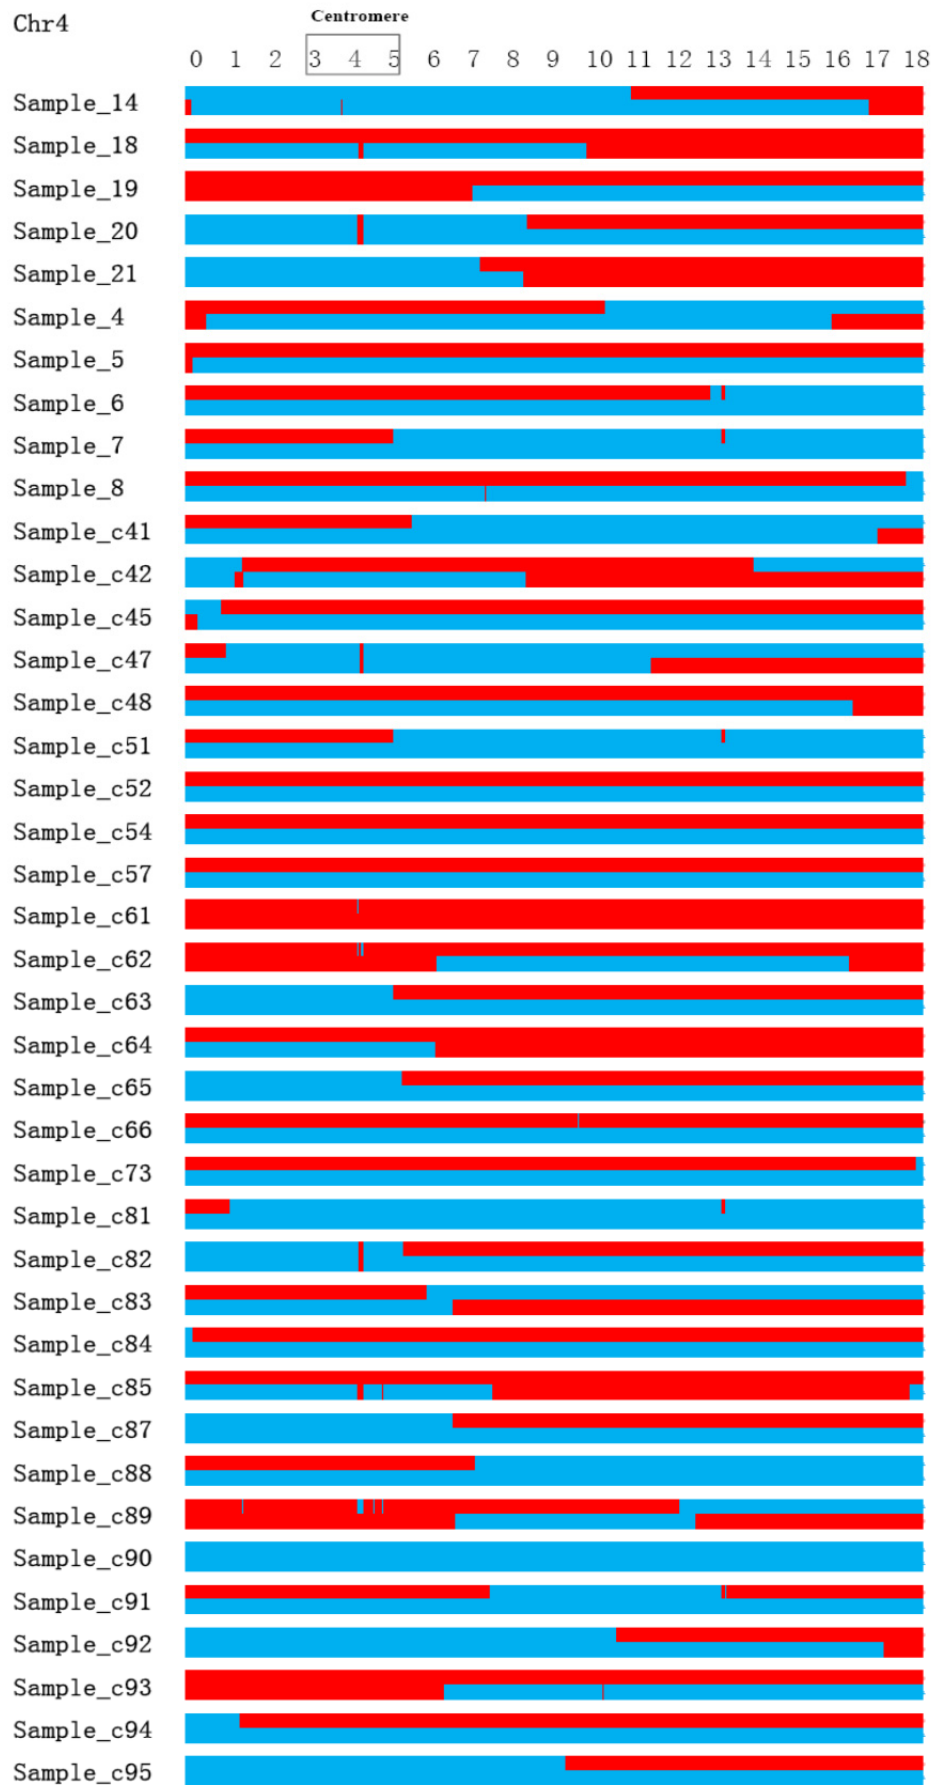

**e**

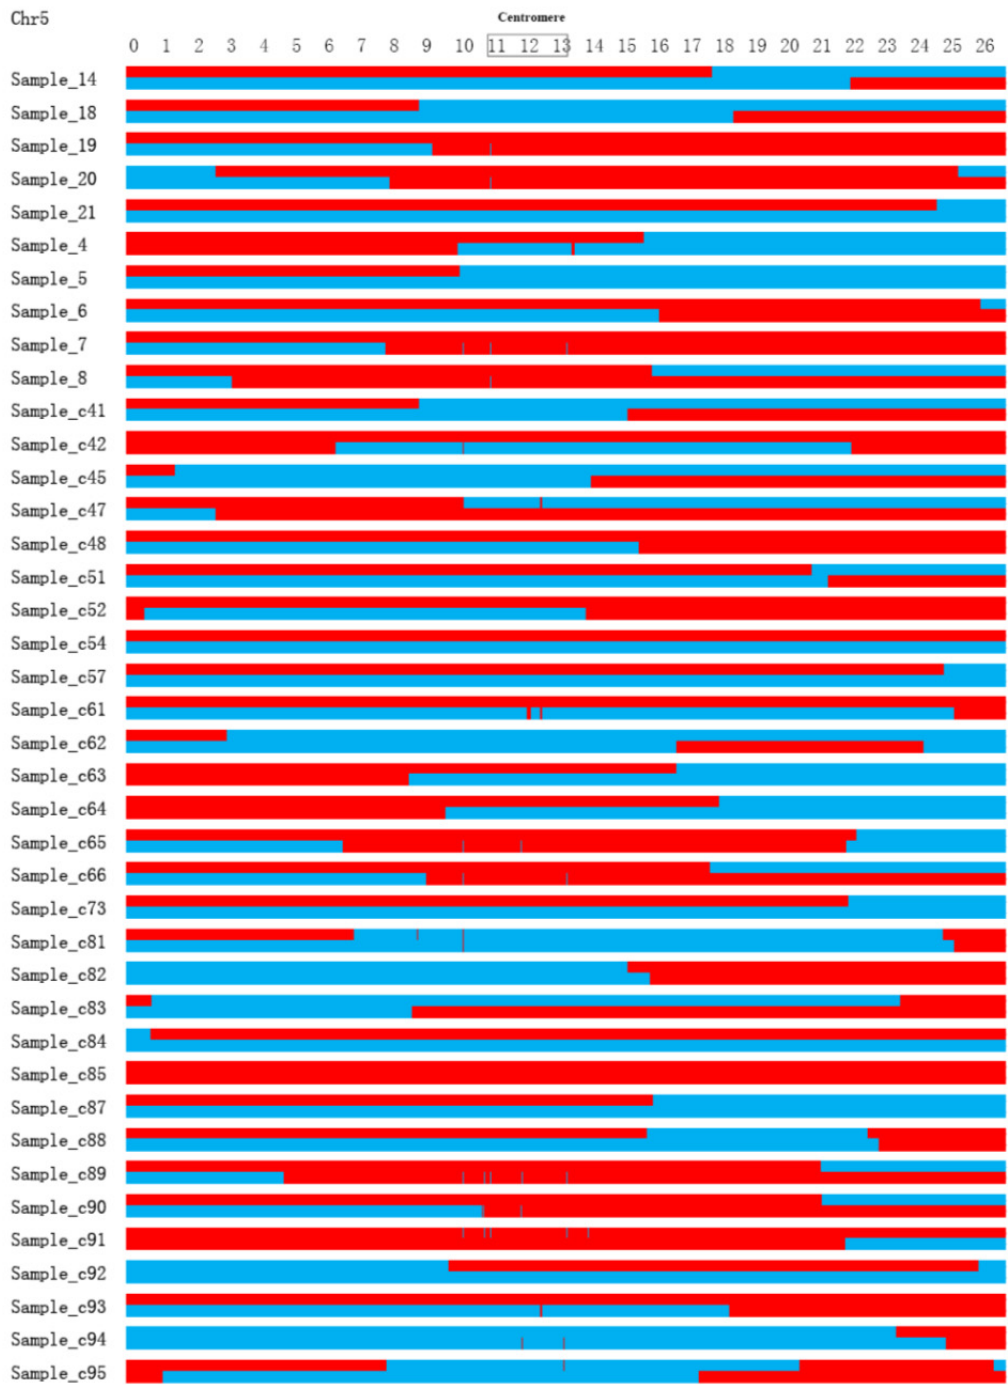

**Fig. S2. The relationship between marker number in both GCs and small part of small COs and their occurrence.** The Y-axis is the number of events of GCs and some small COs per plant. The X-axis is the number of markers in each GC or small CO event. The formula is calculated based on the black dots which are the observed data. The three red dots are expected for the numbers of GCs with 1-3 markers, based on this formula. The expected numbers (1718, 797 and 370) are actually less than those (5240, 1491 and 578 for 1-3 markers identified, respectively).

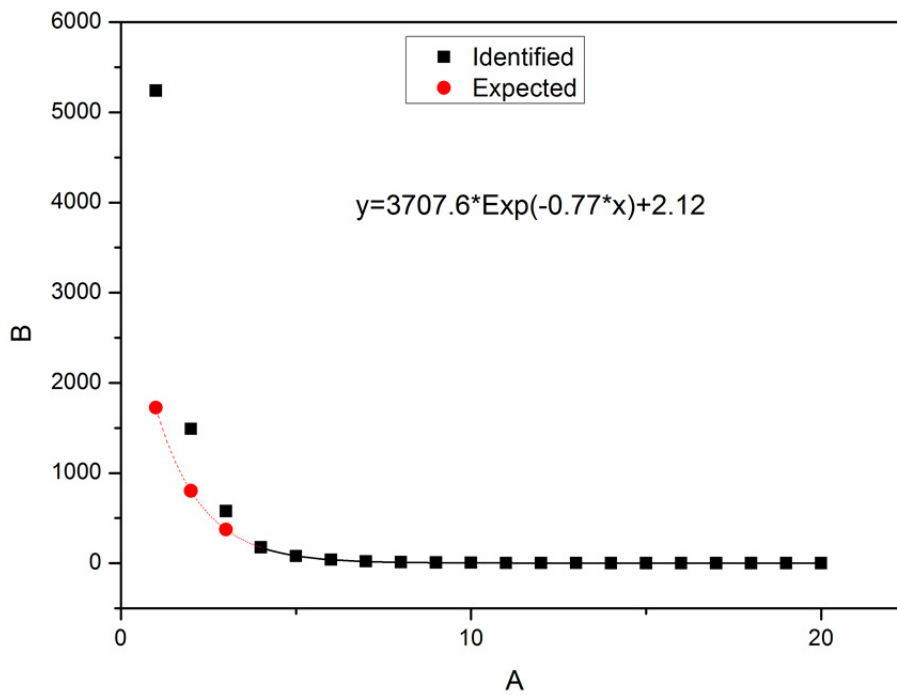

**Fig. S3. Distribution of COs (a and b) and GCs (c) on five chromosomes.** The long (>500Kb, a) and small COs (10-500 Kb, b) are shown separately. Shared and non-shared GCs (20bp to 10 Kb, c) were demonstrated by different lines. The centromere regions were represented as grey bars in c. **a.** Distribution of the long COs (>500Kb) on chromosomes. **b.** Distribution of the small COs (10-500 Kb) on chromosomes, where ~72.6% of small COs were located in centromeres or 2 Mb regions around, the hot-spots distribution. On average, 17.0 out of 120 Mb (14.2%) of the 2-Mb regions are converted during one meiosise. **c.** Distribution of GCs on chromosome 3, 4 and 5. See Fig 2b for chromosomes 1 and 2. Shared and non-shared GCs were demonstrated by black and red lines, respectively. The centromere regions were represented as grey bars. The total GC numbers were calculated for every Mb of 31 F<sub>2</sub> individuals along a pair of chromosomes. Only these GCs in Table 2 were used.

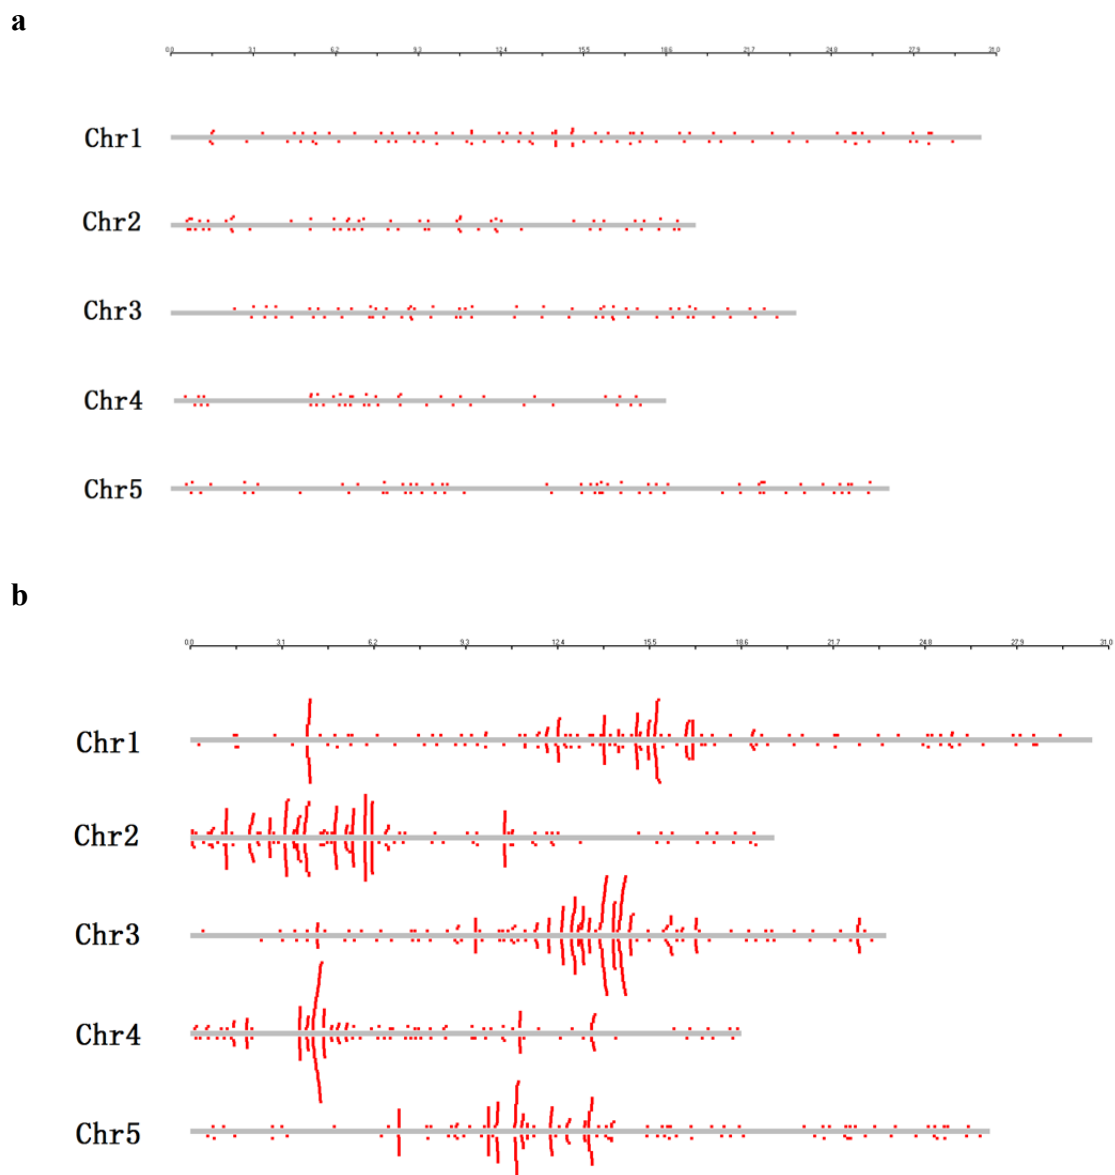

**c**

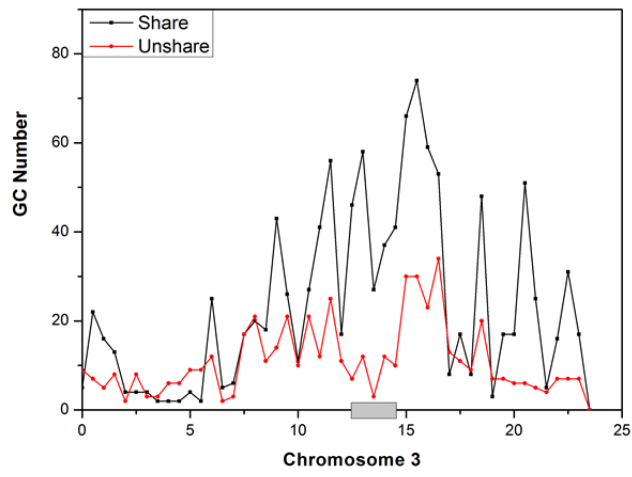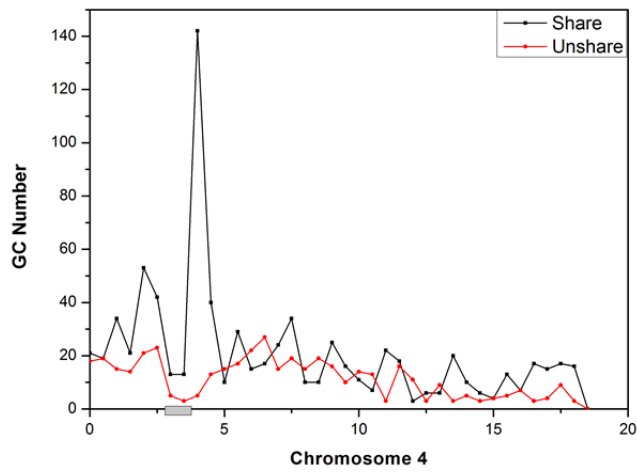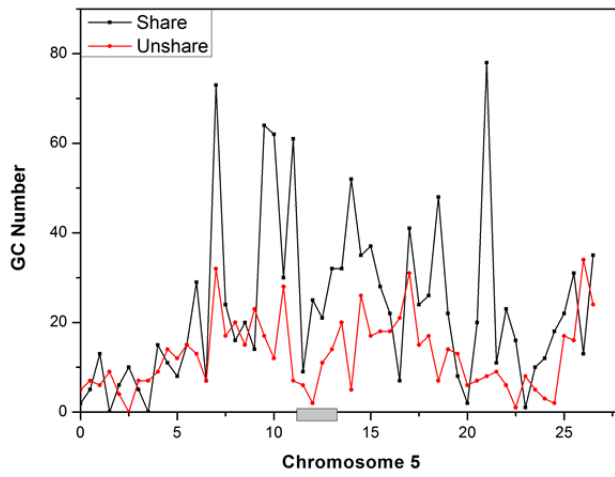

**Fig. S4. Correlation between CO sizes and chromosome lengths.** a. When the CO size is  $\geq 500\text{kb}$ , the average CO number is correlated with chromosome physical length, which is consistent with previous studies (Salome et al. 2012). b. When the CO size is  $>10\text{ kb}$ , the positive correlation was not detected ( $r=-0.078, P=0.90$ )

**a**

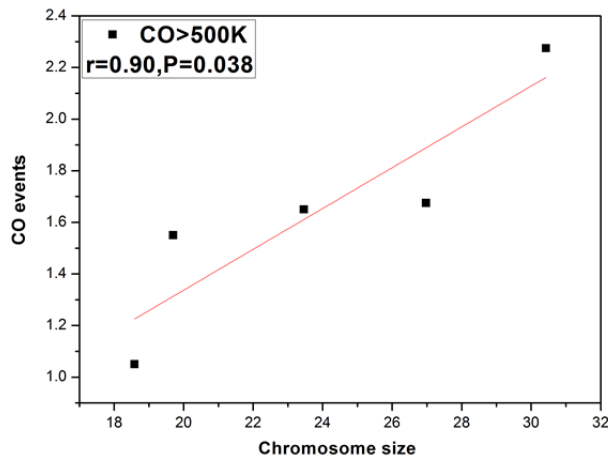

**b**

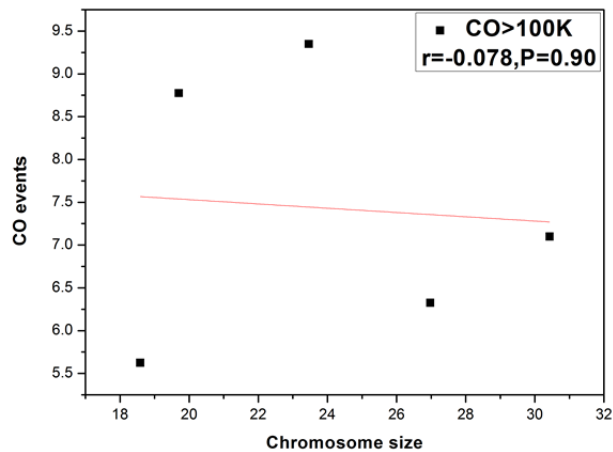

**Fig. S5. The heterogeneous paired-ends the same insert at the CO transition border.**

There are two examples to display the mapped reads in breakpoints of CO events by using software inGAP-sv (<http://ingap.sourceforge.net/>) at the position 13949040 on chromosome 1 in Fig. 1b (pointed by an arrow) and 4925084 on chromosome 2. In the top figure, the genotype in this region (the top bars) should be LLLL-HH, the H-genotype within L background. The breakpoint is marked with an arrow. The red and blue vertical lines denote L-homozygosity and heterozygosity (H) markers, respectively. The blue squares stand for the reads at the left side of paired ends and the red ones at right side. The grey lines are un-sequenced region of an insert between the two sequenced ends as a pair. The stars (\*) indicate those reads that have Het marker(s) on the left sides but Ler marker(s) on the right for the same paired ends. Actually, the reads around breakpoint contains heterogeneous markers in themselves. The bottom figure is another example of a breakpoint in the end.

In total, 12 COs in Sample\_c94 and c95 (each with 97× coverage) meet our criteria. 8 of them are confirmed to be real and the others can be still true because of the drawbacks in this analysis (see Methods for explanation). These examples, the changed state at the border of CO transition, show that the COs are not from building problems and that high mapping quality is obtained by the long paired ends (2×100bp) in a long insert (500bp)

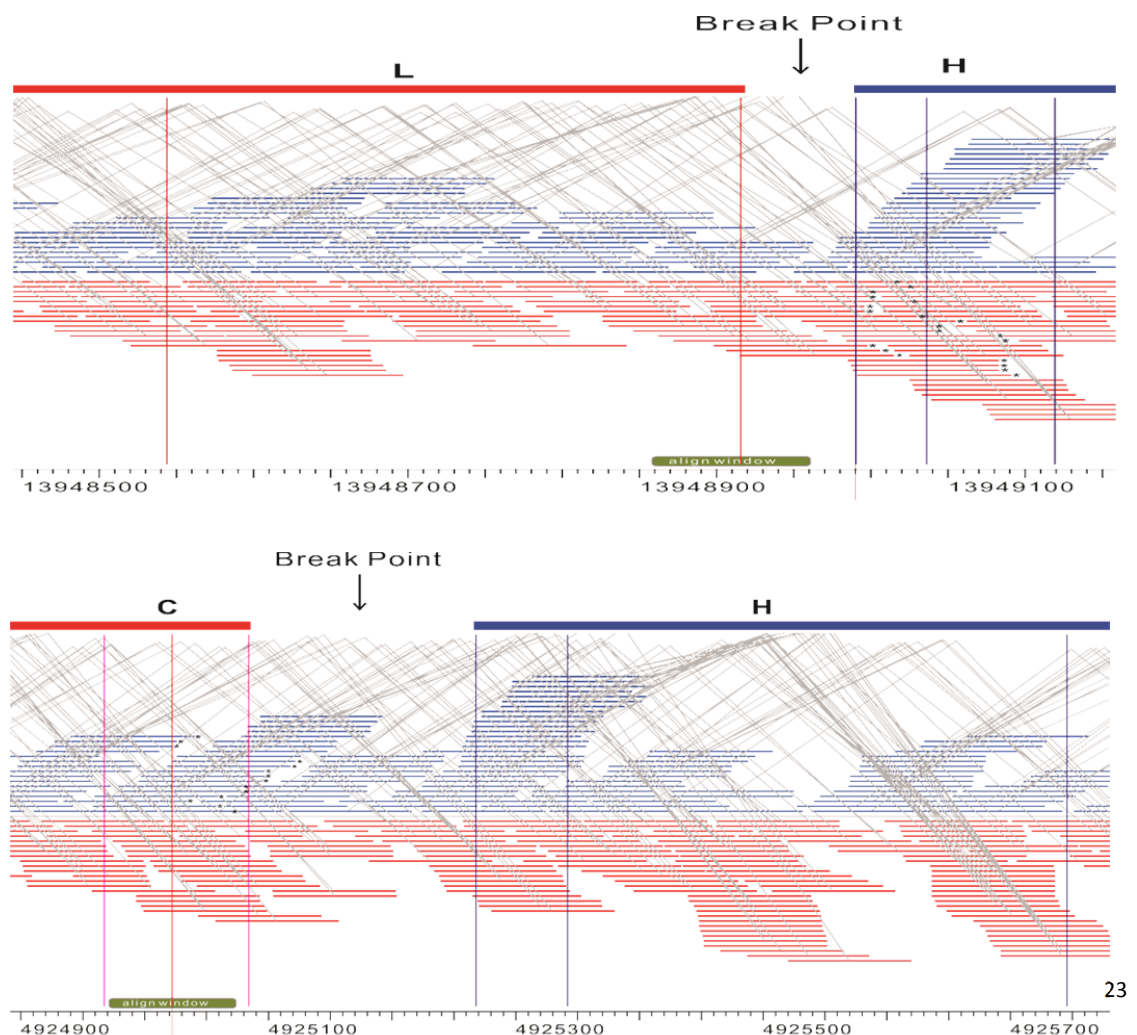

**Fig. S6. The level of SNPs around crossover breakpoints (top), gene conversions (middle) and randomly sampled loci (bottom) for all events (a) and for intergenic events alone (b).**

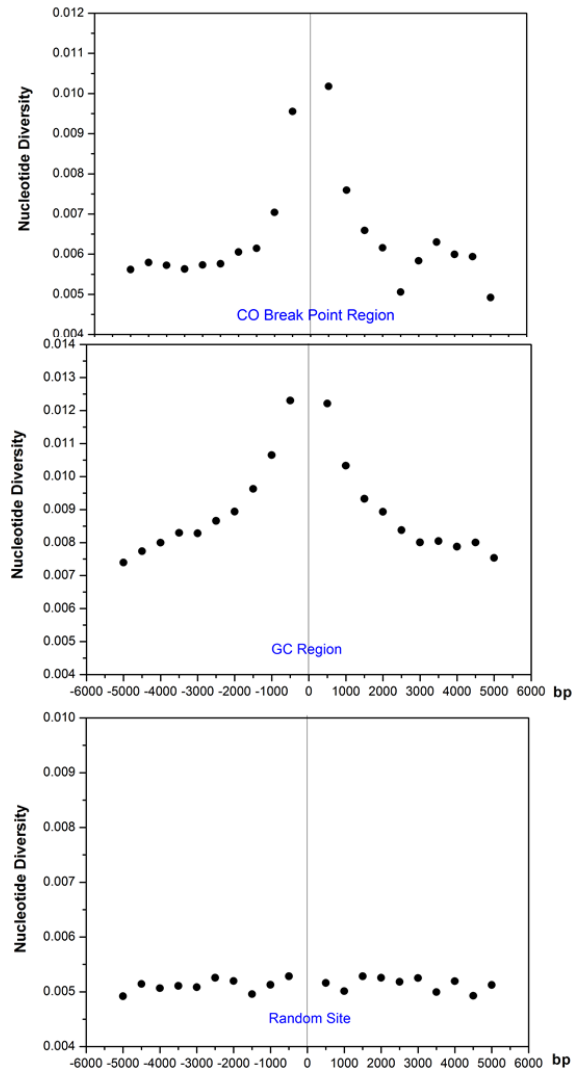

**6a The level of SNPs around crossover breakpoints (top), gene conversions (middle) and randomly sampled loci (bottom).** The Y-axis is the level of nucleotide diversity and the zero point of X-axis is the break positions of COs, two borders of GC tracts or randomly sampled positions. The absolutely number represents 100 bp distance from the zero position.



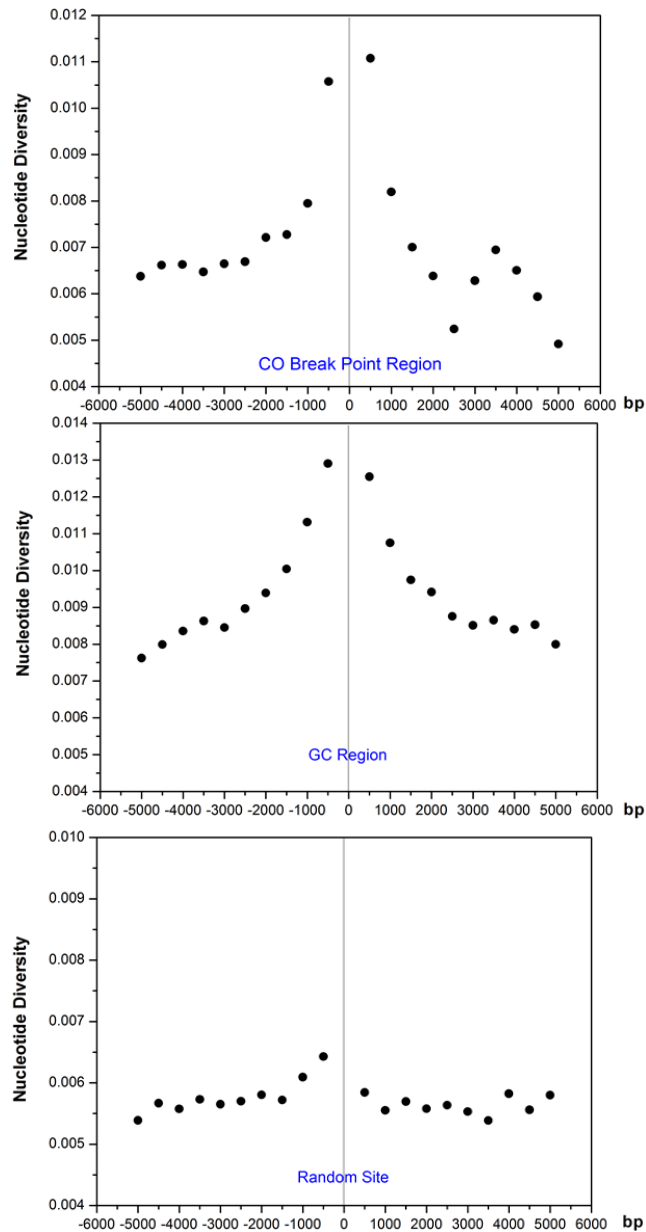

**6b. The level of SNPs around intergenic crossover breakpoints (top), gene conversions (middle) and randomly sampled loci (bottom).** Given that recombination events tend to avoid genes and genes tend to have higher constraint, it is worth asking whether the genome wide pattern (Fig S6a) is replicated if we just examine intergenic domains. This is presented here. As most The Y-axis is the level of nucleotide diversity and the zero point of X-axis is the break positions of COs, two borders of GC tracts or randomly sampled positions. The absolutely number represents 100 bp distance from the zero position.

**Addendum: Diversity near GC events.** A higher diversity in the vicinity of GC events is likely in part to be a definitional necessity. Imagine that DSB followed by SDSA events were randomly located around the genome. When this event occurs but the domain of influence (circa a few hundred bp on average) contains no SNPs we cannot detect it. This must lead to a correlation between rates of observed GC and local diversity, if only because in zones of zero diversity there must have zero GC events, rooting any regression through the origin. So one could say that the correlation is an ascertainment bias. However, if by gene conversion one means not just that DSB followed by SDSA (or whatever mechanism) occurs but also that this is accompanied by a shift in polymorphic alleles (the conversion part of GC), then by definition, GC can only occur when there is diversity. In this sense the GC/diversity correlation is a necessary consequence of definition, not an ascertainment bias: with random DSB and SDSA, GC has to be more common in zones of higher diversity.

A second question is whether the diversity in the vicinity of GC events is higher than would be expected given that higher diversity is expected in GC domains owing to the definition of GC requiring SNPs to convert. We address this via simulation. Here we sample from the observed size distribution of GC events. We randomly place these events on the genome and then reject any events that don't pass our filters: they must contain enough SNPs. We can then ask about the diversity in the vicinity of this pseudo random set. The diversity (0.012) around the breakpoints of our identified GCs is significantly higher than the random tracks (0.0073; from 10,000 times' random repeats;  $P < 0.0001$ ) which in turn is higher than around unbiased randomly selected sites. This indicates that diversity is higher than expected around GC sites, even permitting that GC events require diversity to define them.

As regards crossing over we can be confident that there cannot be an ascertainment bias.

On average crossing over events are very long 100kb+ while SNPs are at a very fine resolution (one per every 250bp or so). It is next to impossible for us to miss any such crossing over events and so there can be no ascertainment bias whereby some biased set of events are missed. The probability a breakpoint would be in a zone of high diversity should then be approximately equal to the proportion of zones that are high diversity under the random location of breakpoints model.

**Fig. S7. Distribution of crossover breakpoints (CBs) and gene conversion tracts (GCTs) in genes and their flanking sequences.** Each intergenic sequence was partitioned into two fragments with equal length, both of which were assigned as the 3' or 5' flanking sequences to the two adjacent genes according to their transcription directions, respectively. Total CBs and GCTs were counted in CDS, UTR and intron regions, and 500-bp non-overlapping windows of flanking sequences, respectively. Then the numbers of CBs and GCTs were divided by the sequence length and by the total number of markers in different regions or windows, respectively. Therefore, the y-axis ( $\times 10^{-2}$ ) reflects the occurrence rate of CBs and GCTs in corresponding regions of 31 F<sub>2</sub> plants, after excluding the uneven distribution of marks and the length difference.

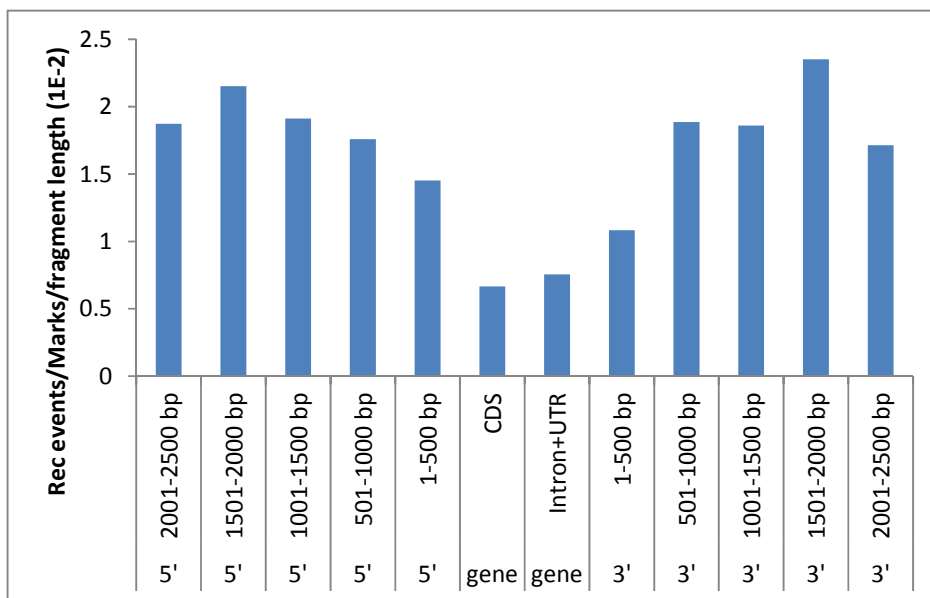

**Fig. S8 Trees for shared GCs and COs.** The F<sub>2</sub> plant trees grouped relative to their shared GCs (a) and COs (b), constructed by shared loci (using 1 for shared present or 0 for absent) and by Maximum Likelihood (ML) method using Phylip-3.69. The confidence for each branching node was assessed by bootstrap analysis with 1000 replicates.

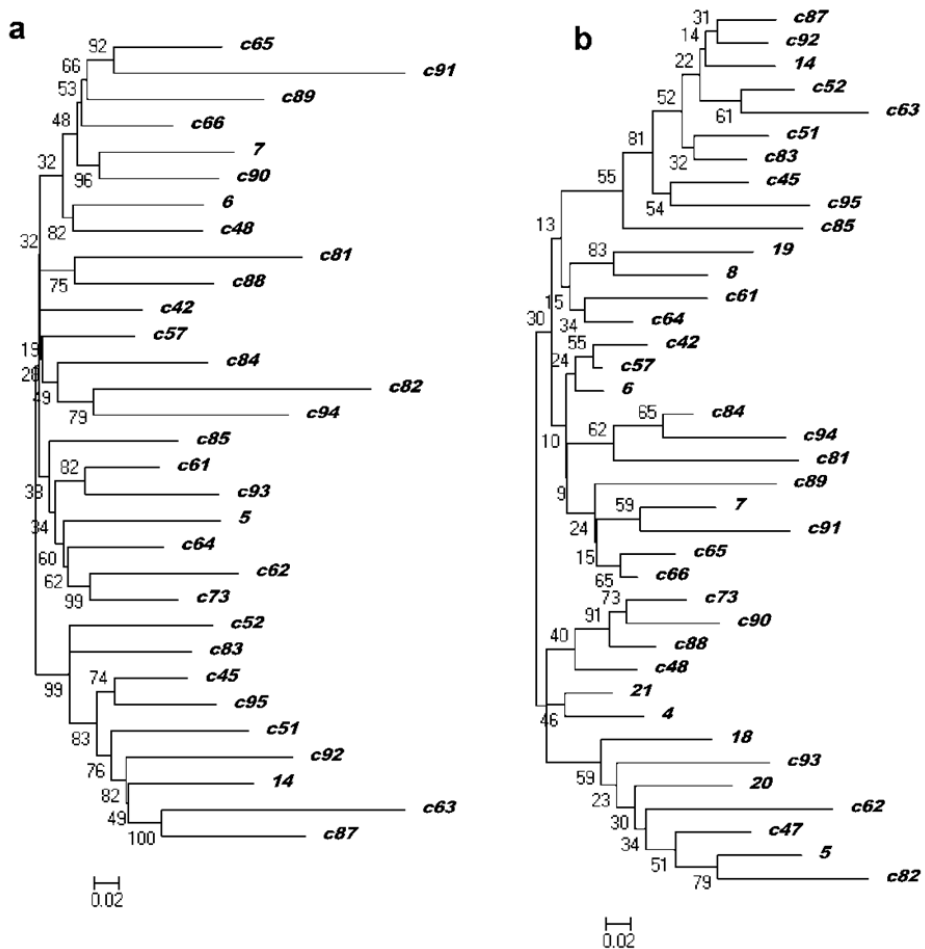

**Fig. S9. Distribution of shared small COs on chromosomes**

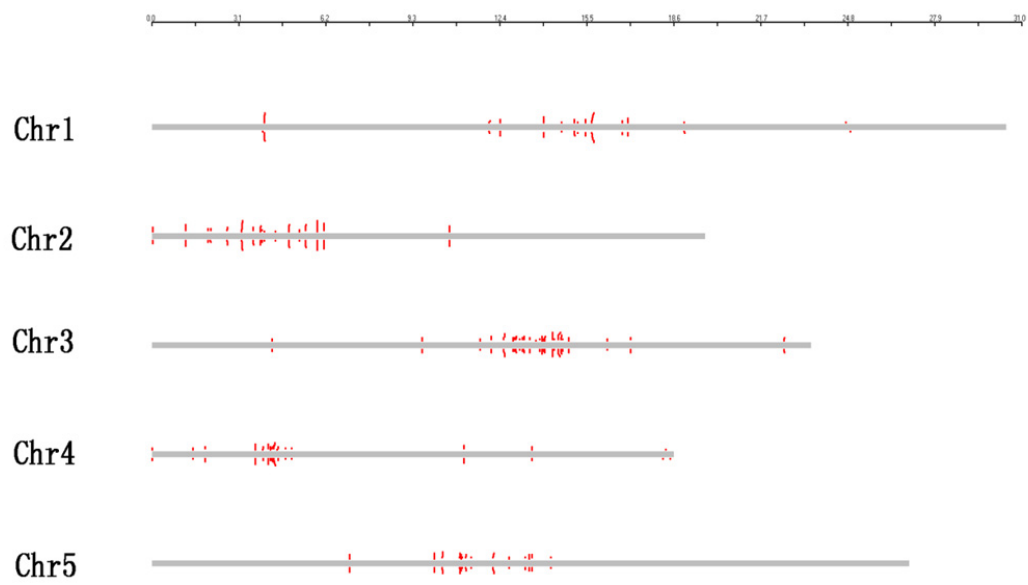

**Fig. S10.** Two examples of the consistent results between background genotypes and confirmed pattern of PCR and Sanger sequences in the shared small CO (a, 45623bp) and GC (b, 1570) among 3 and 7 different individual plants, respectively. The PCR positions and lengths are showed proportionally. The last (a) and the last four plants (b) are controls with different backgrounds, where no CO or GC events occur. There were two locations of PCRs in a and four different pairs of PCRs in b to show the consistent results, respectively. These results strongly suggest that the shared small CO and GC are not artifacts.

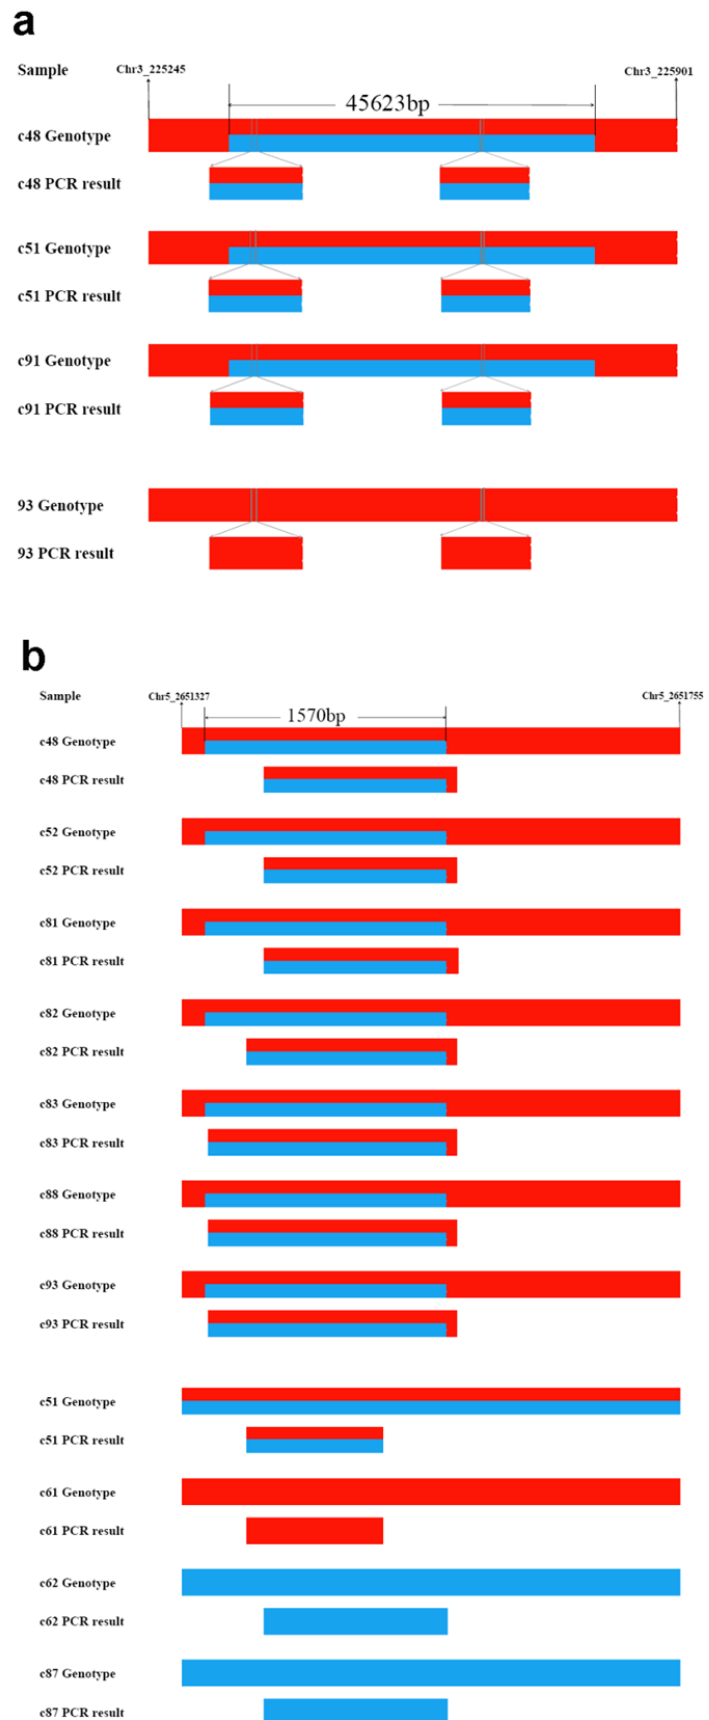

**Fig. S11. Distribution of the Col- or Ler-homozygous sequences along five chromosomes in 40 F<sub>2</sub> plants.** The average proportion of Col- or Ler-homozygous sequences was calculated for every Mb of 40 F<sub>2</sub> individuals along a pair of chromosomes.

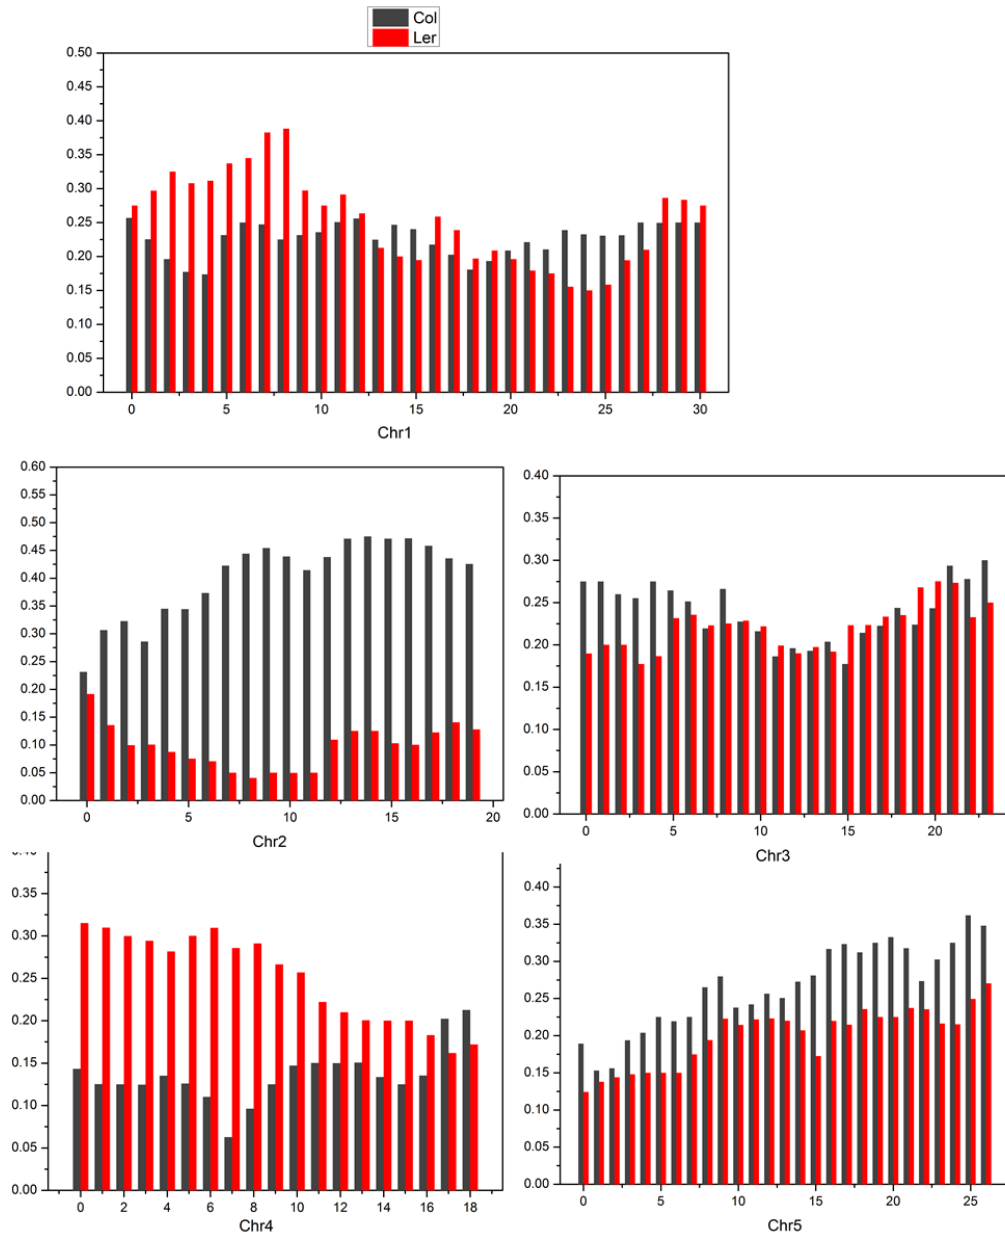



**Fig. S12. Inference of the direction of SNPs**

For any putative gene conversion event we can assess whether the conversion converted an AT to a GC or vice versa. Here a Ler->Col conversion events means the Ler genotype is replaced by the Col genotype, A->G means an A converted to a G etc.

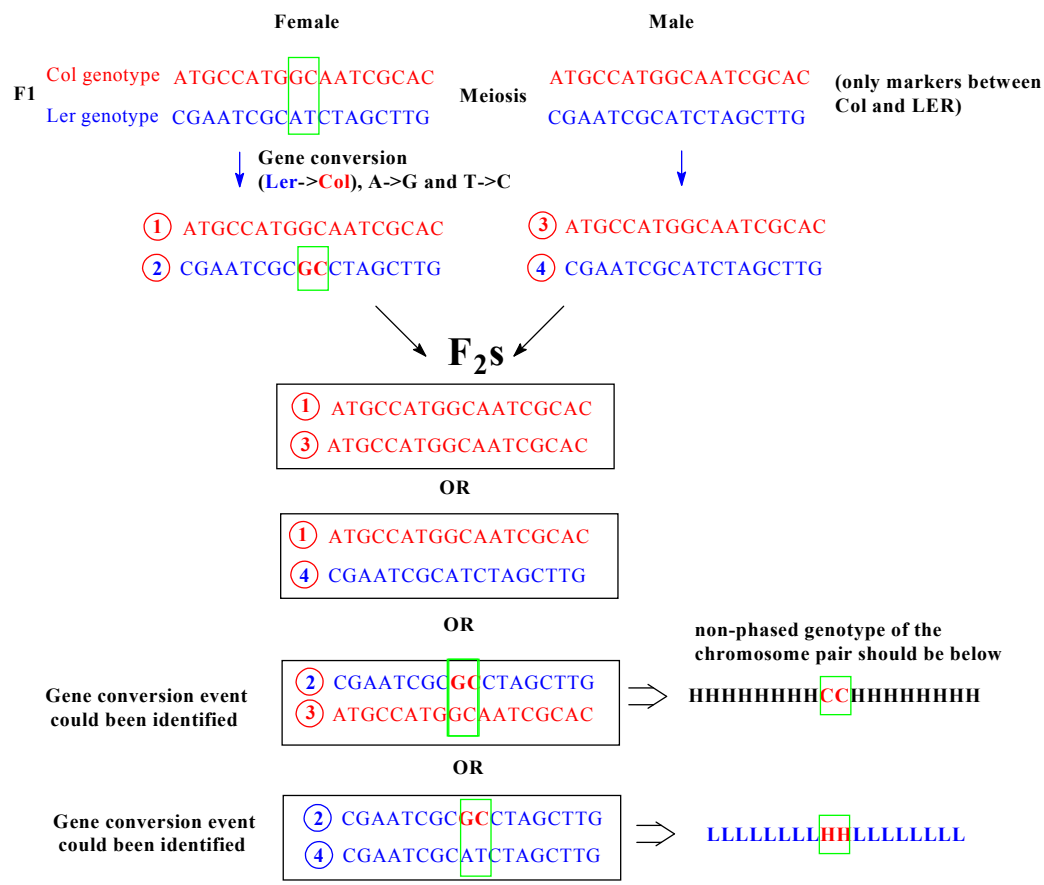

For the genotype of the chromosome pair of HHHHHHHHCCHHHHHHHH, it is clear that the orientation of the gene conversion should be Ler->Col, then the mutation should be A->G and T->C.

Also for the genotype of the chromosome pair of LLLLLLLLHHLLLLLLLL, it is also clear that the orientation of the gene conversion should be Ler->Col, then the mutation should be A->G and T->C.

### Fig. S13. Evaluation of CO interference

The >500kb-track COs and >10kb-track COs are used to test the CO interference, respectively. In principle, only double COs on single chromosome could be used for measure of CO interferences (Salome, P. A. *et al.* 2011). However in our study, due to the lack of enough double COs, double and more COs were used. If one chromosome has 2 or more COs, the total physical distance of all CO-pairs (a) is used to calculate the mean (mean CO-pair distance) and s.d. (the associated standard deviation) of their distances. The function `dgamma` (chromosome length, shape, rate) in R is used to simulate the CO interference with gamma distribution (scale = (s.d.)<sup>2</sup>/ mean; shape = (mean / s.d.)<sup>2</sup>); b. Cross-over interference was calculated with >500 kb tracks of the COs, suggesting a positive CO interference affecting all chromosomes; c. When using tracks of COs with >10 kb, the figures do not meet the model of gamma distribution.

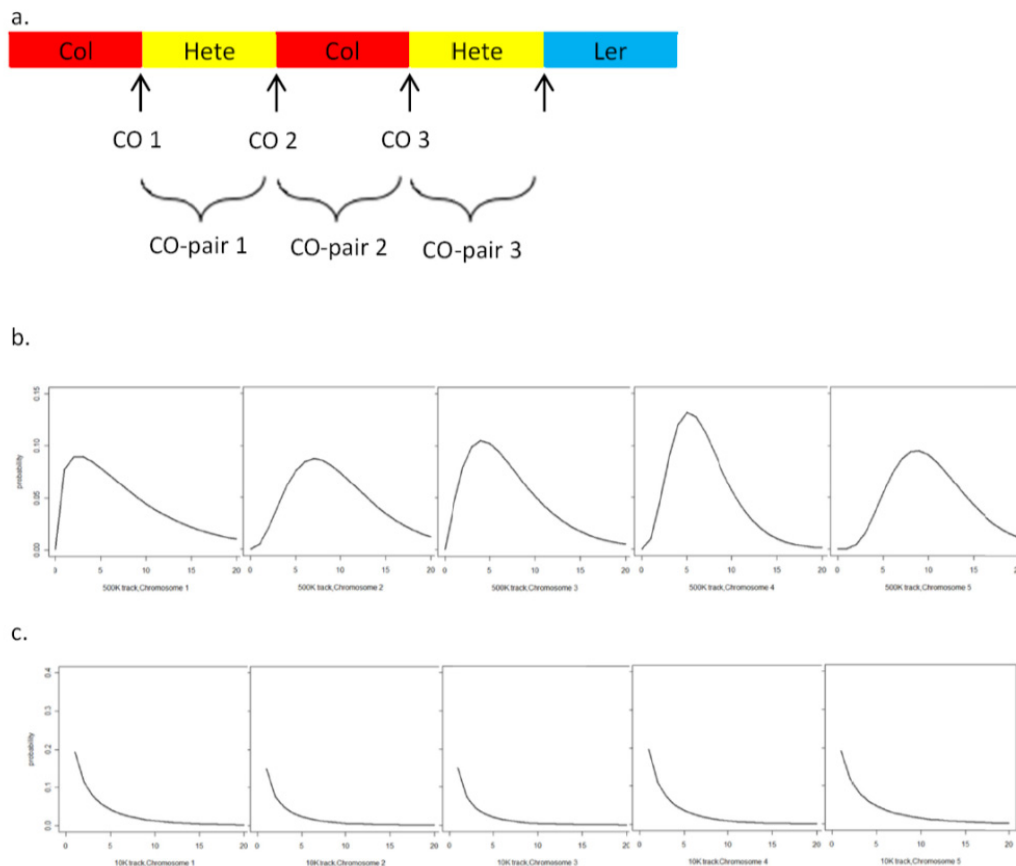

**Figure S14. Inference of identification of crossover events.** Each background is a tract of long COs when its net size is still  $\geq 500$  kb when excluding the total length of other genotype blocks, which in total must be  $< 20\%$  of a long CO. A small CO, identified from long COs and the other regions, can contain GCs but must still be from 10 to  $< 500$  kb after excluding the GC blocks which in total must be  $< 20\%$ . All the spans of COs are used to calculate the proportion of H, C and L in a plant

**Case 1: a background  $> 500$  kb**

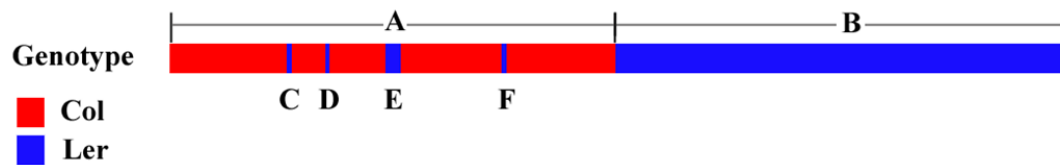

Assuming: A=520 kb, B=500 kb; C=1 kb, D=1 kb, **E=8 kb** ( $< 10$  kb), F=1 kb;

Region A:  $\frac{C+D+E+F}{A} = \frac{1+1+8+1}{520} = 0.021 < 20\%$

and  $520 \text{ kb} - 1 - 1 - 1 - 8 = 509 > 500 \text{ kb}$

Therefore, the genotype of region A in one chromosome should be Col.

Then, **one cross-over events** (between regions A and B) can be detected in this condition.

**Case 2: a background  $< 500$  kb**

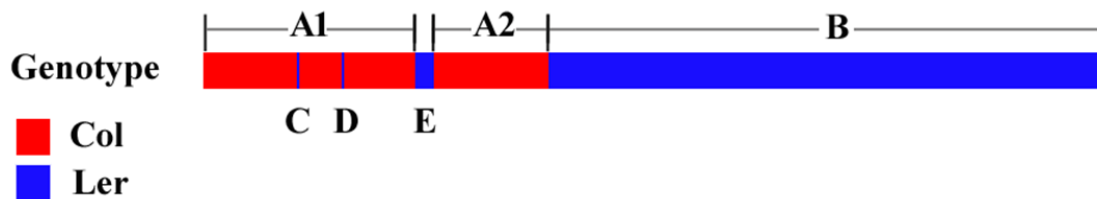

Assuming: A1=150 kb, A2=100 kb, B=500 kb, E=50 kb ( $> 10$  kb); C=1 kb, D=1 kb;

(1)  $A1+E+A2=300 \text{ kb} < 500 \text{ bp}$ ;

(2)  $A1 = 150 \text{ kb} > 10 \text{ kb}$ ,  $A2 = 100 \text{ kb} > 10 \text{ kb}$ ,  $E=50 \text{ kb} > 10 \text{ kb}$ ;

Therefore, **one large** (between regions A2 and B; due to  $B \geq 500$  kb) and **two small** (between regions A1 and E, E and A2; 10-500 kb) **cross-over events** can be detected.

## **Other Supporting Information Files**

[Dataset S1 \(XLSX\)](#)

[Dataset S2 \(XLSX\)](#)
